# Supplementary material for: Manuel Peña: propietario de la camisería Canalejas de Madrid
Source: Royal Society of Chemistry journal article supplement (doi:10.1039/c9dt00554d), 2004-01-01
Supplement: c9dt00554d1.pdf [file c9dt00554d1.pdf]

## Supporting information for the manuscript

### Carbon Dioxide Reduction by Dinuclear Yb(II) and Sm(II) Complexes Supported by Siloxide Ligands

Aurélien R. Willauer,<sup>a</sup> Davide Toniolo,<sup>a</sup> Farzaneh Fadaei-Tirani,<sup>a</sup> Yan Yang<sup>b</sup>, Laurent Maron<sup>b</sup> and  
Marinella Mazzanti\*<sup>a</sup>

---

<sup>a</sup> *Institut des Sciences et Ingénierie Chimiques Ecole Polytechnique Fédérale de Lausanne (EPFL), 1015 Lausanne (Switzerland)*

*E-mail: [marinella.mazzanti@epfl.ch](mailto:marinella.mazzanti@epfl.ch)*

<sup>b</sup> *Université de Toulouse et CNRS INSA, UPS, CNRS, UMR 5215, LPCNO,  
135 avenue de Rangueil, 31077 Toulouse, France.*

## Content

|                                                       |    |
|-------------------------------------------------------|----|
| A. NMR SPECTROSCOPIC DATA.....                        | 3  |
| B. IR SPECTRUM .....                                  | 16 |
| C. X-RAY CRYSTAL STRUCTURE DETERMINATION DETAILS..... | 17 |
| D. COMPUTATIONAL DETAILS.....                         | 19 |

## A. NMR spectroscopic data

### Syntheses and stability of 1-Yb and 1-Sm.

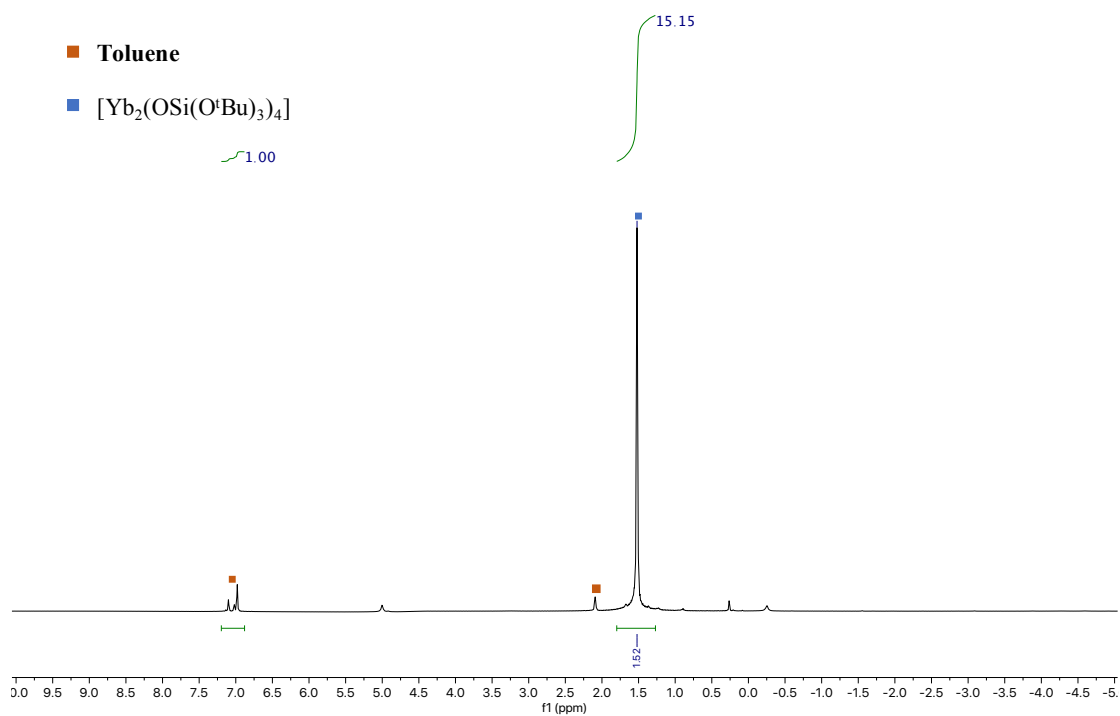

**Figure S 1:**  $^1\text{H}$  NMR spectrum of **1-Yb** ( $\text{Tol-d}_8$ , 400 MHz, 298 K) immediately after the dissolution in  $\text{Tol-d}_8$ .

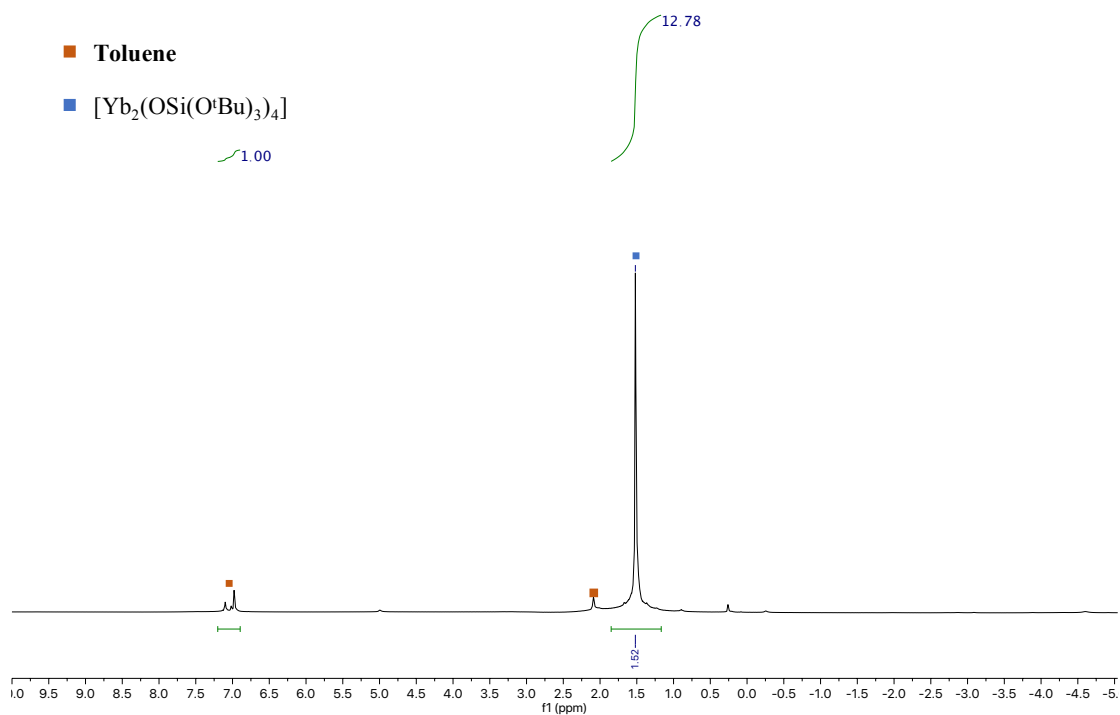

**Figure S 2:**  $^1\text{H}$  NMR spectrum of **1-Yb** ( $\text{Tol-d}_8$ , 400 MHz, 298 K) after 5 days at room temperature in  $\text{Tol-d}_8$ .

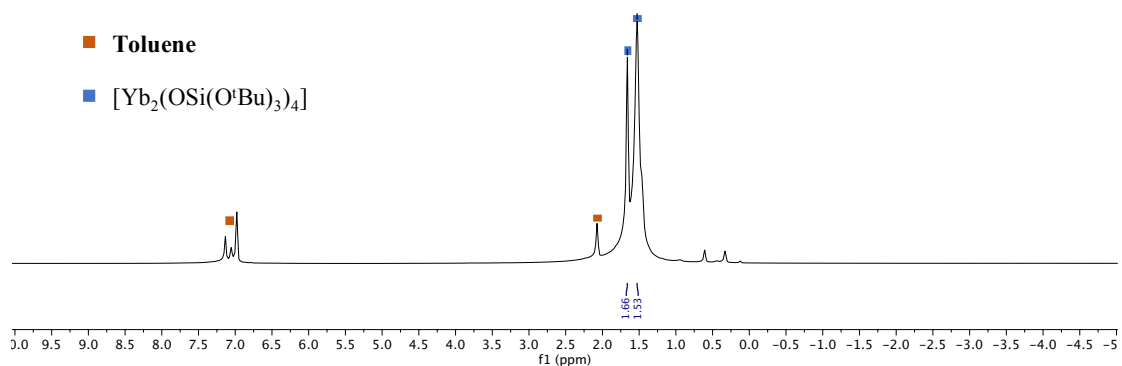

**Figure S 3:**  $^1\text{H}$  NMR spectrum of **1-Yb** (Tol- $d_8$ , 400 MHz, 213 K) recorded at 213 K.

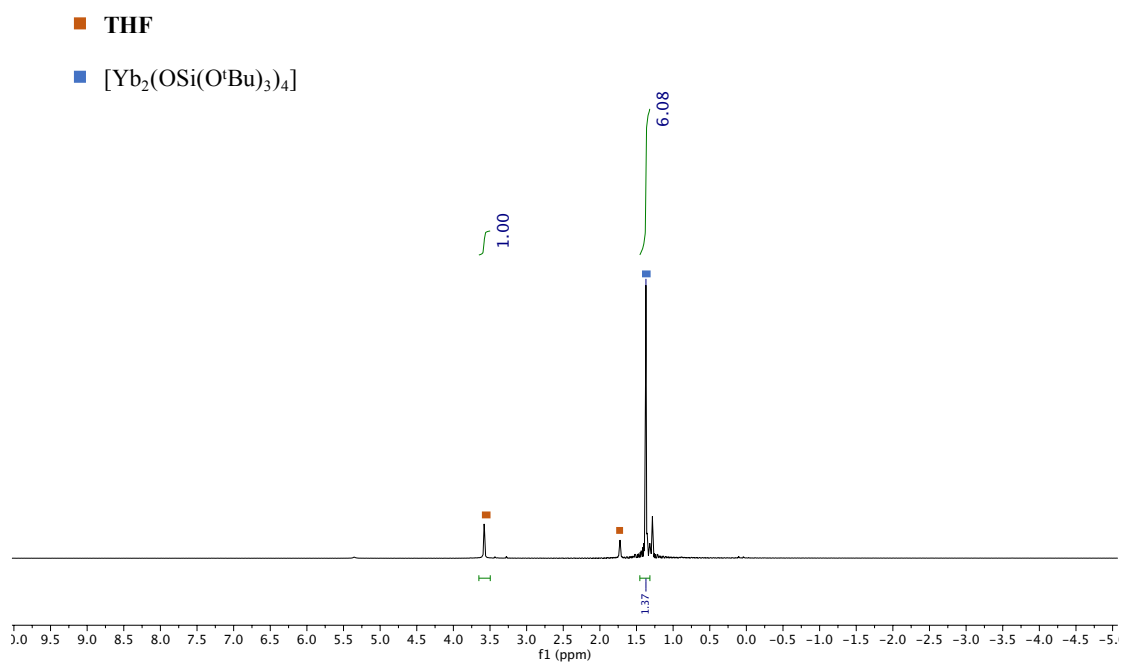

**Figure S 4:**  $^1\text{H}$  NMR spectrum of **1-Yb** (THF- $d_8$ , 400 MHz, 298 K) immediately after the dissolution in THF- $d_8$ .

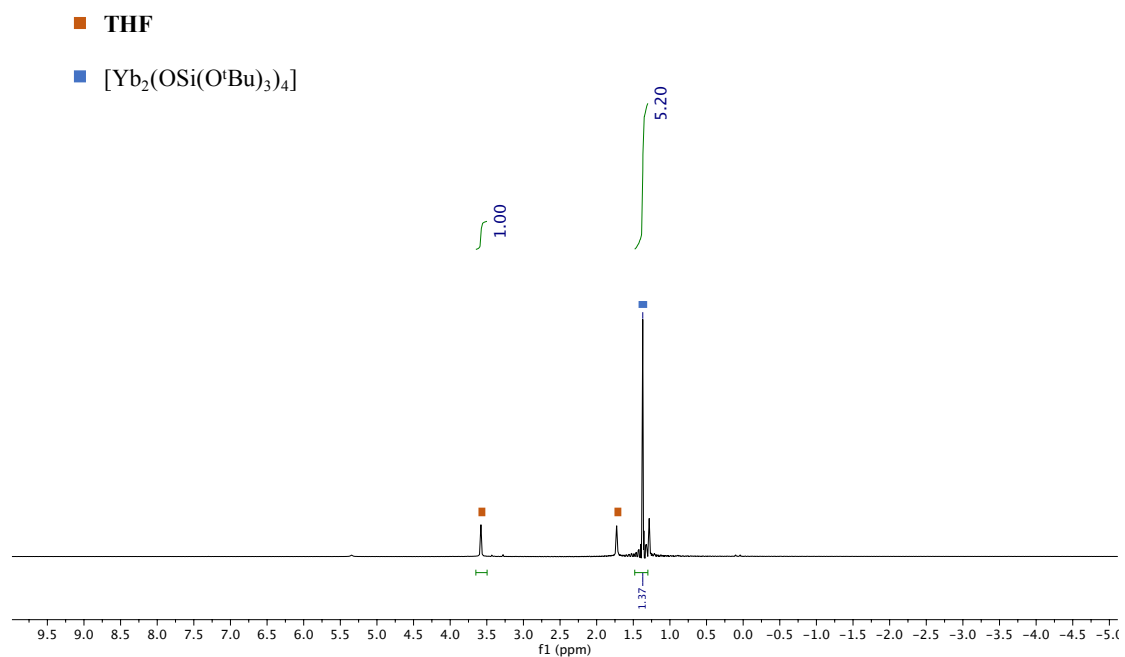

**Figure S 5:**  $^1\text{H}$  NMR spectrum of **1-Yb** (THF- $d_8$ , 400 MHz, 298 K) after 5 days at room temperature in THF- $d_8$ .

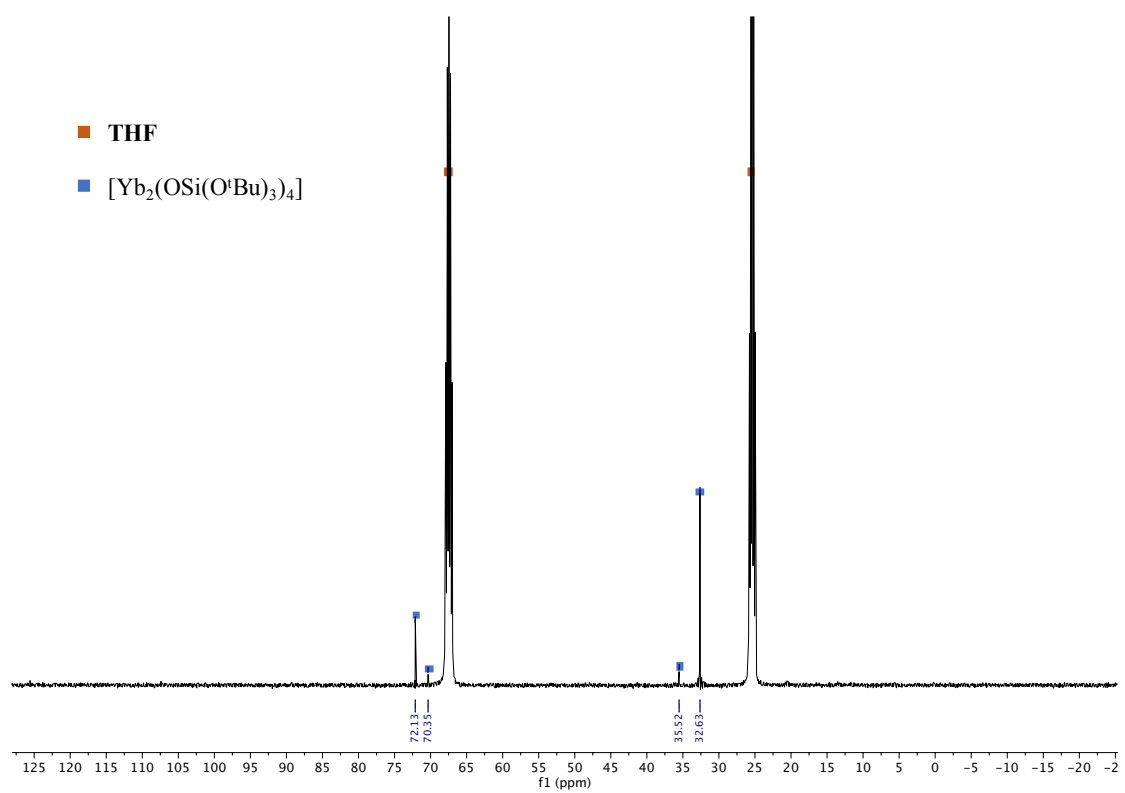

**Figure S 6:**  $^{13}\text{C}$  NMR spectrum of **1-Yb** (THF- $d_8$ , 400 MHz, 298 K).

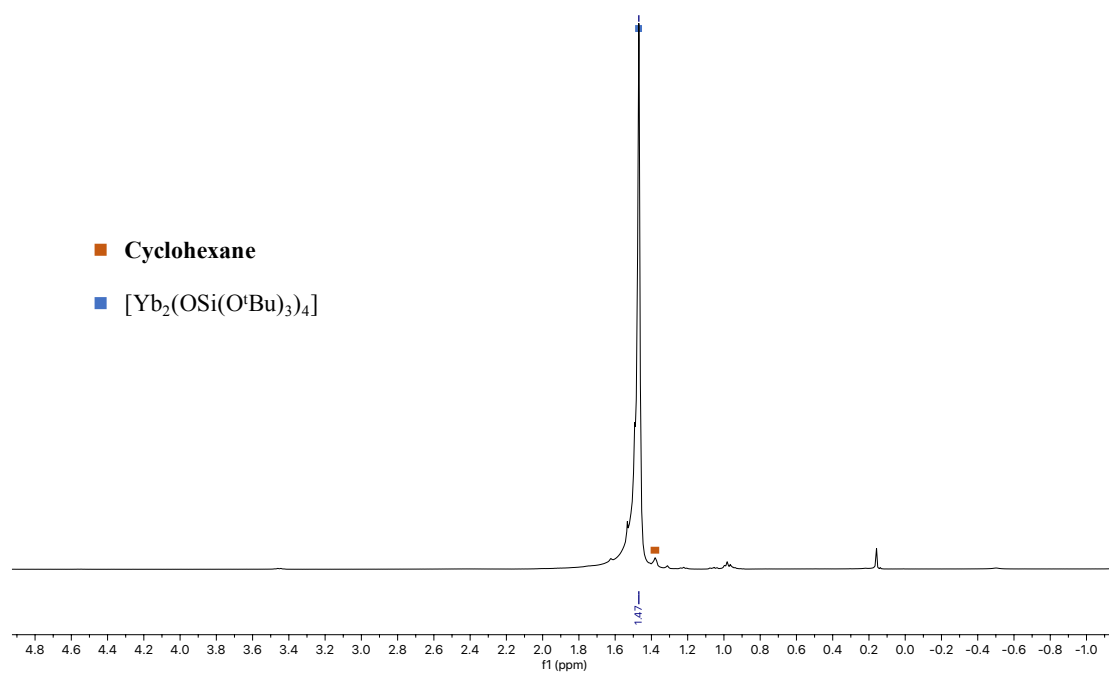

**Figure S 7:**  $^1\text{H}$  NMR spectrum of **1-Yb** ( $\text{C}_6\text{D}_{12}$ , 400 MHz, 298 K).

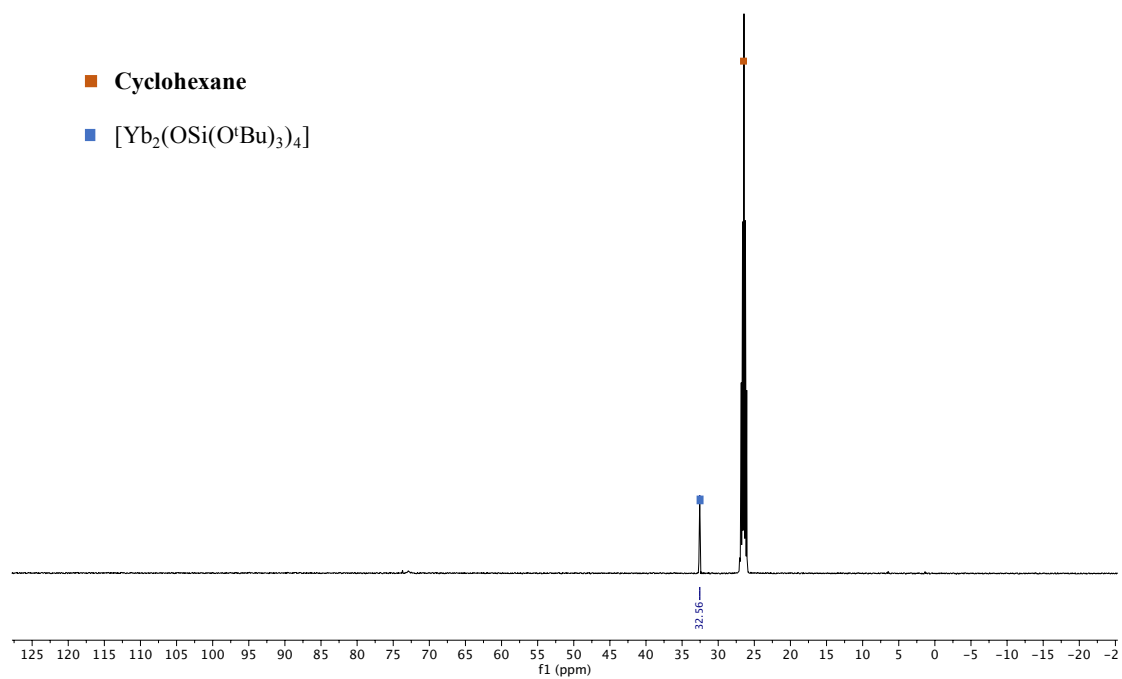

**Figure S 8:**  $^{13}\text{C}$  NMR spectrum of **1-Yb** ( $\text{C}_6\text{D}_{12}$ , 400 MHz, 298 K).

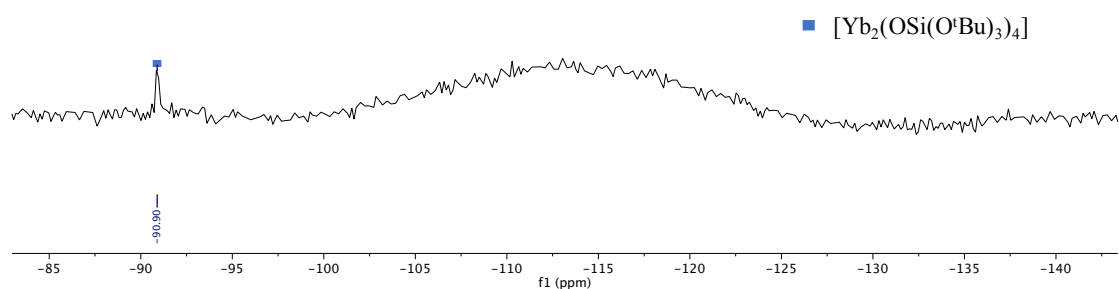

**Figure S 9:**  $^{29}\text{Si}$  NMR spectrum of **1-Yb** (THF- $d_8$ , 400 MHz, 298 K).

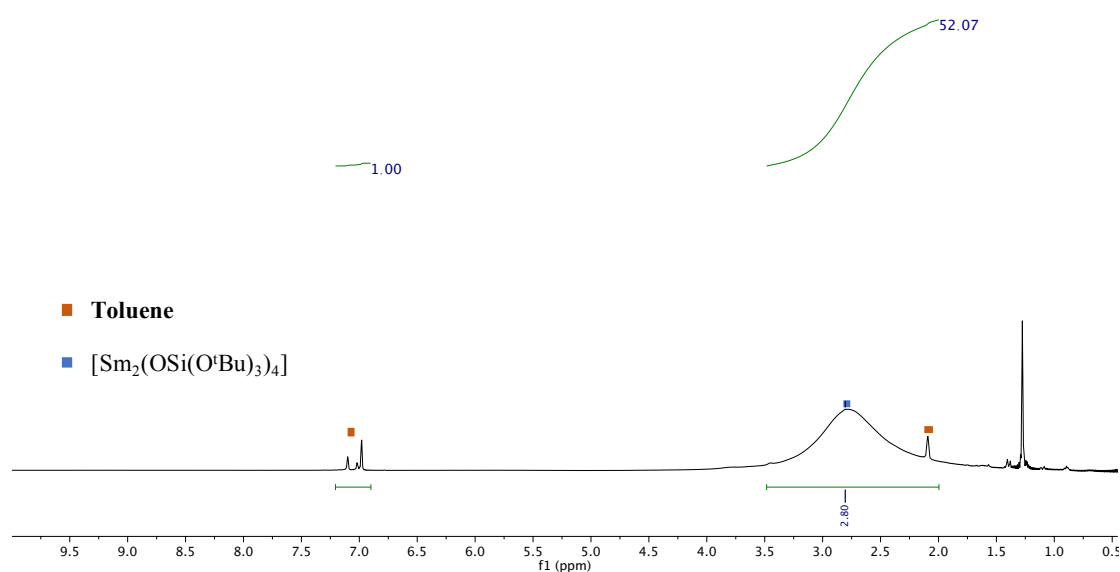

**Figure S 10:**  $^1\text{H}$  NMR spectrum of **1-Sm** (Tol- $d_8$ , 400 MHz, 298 K) immediately after the dissolution in Tol- $d_8$ .

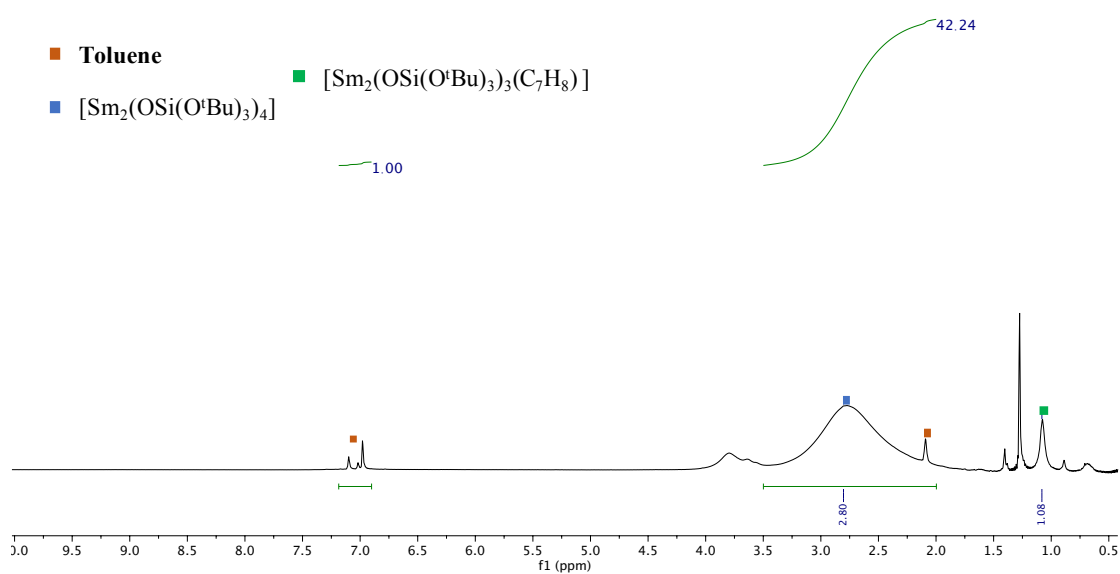

**Figure S 11:**  $^1\text{H}$  NMR spectrum of **1-Sm** (Tol- $d_8$ , 400 MHz, 298 K) after 5 days at room temperature in Tol- $d_8$ .

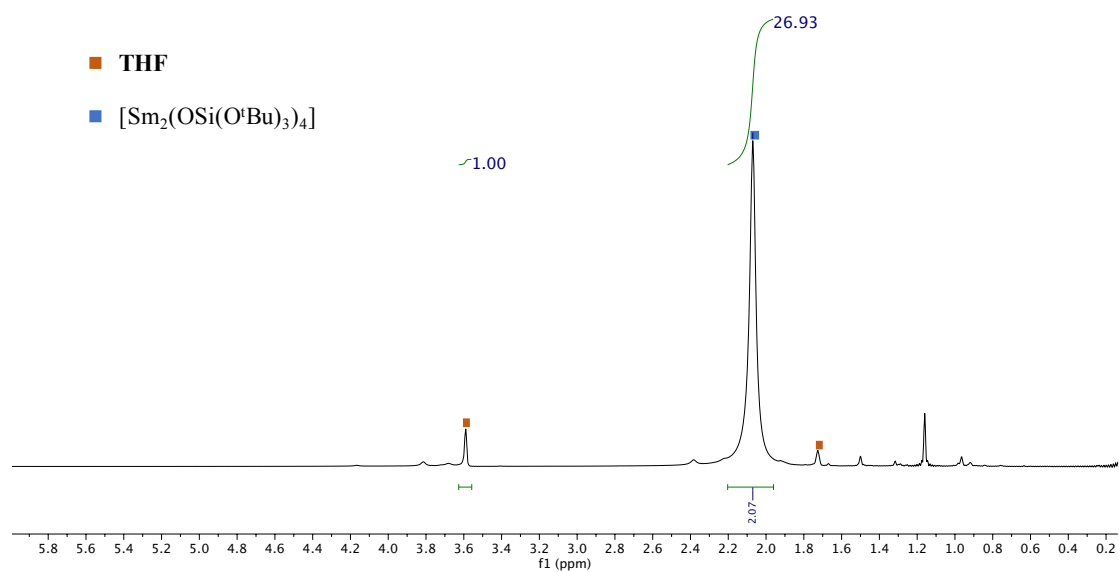

**Figure S 12:**  $^1\text{H}$  NMR spectrum of **1-Sm** (THF- $d_8$ , 400 MHz, 298 K) immediately after the dissolution in THF- $d_8$ .

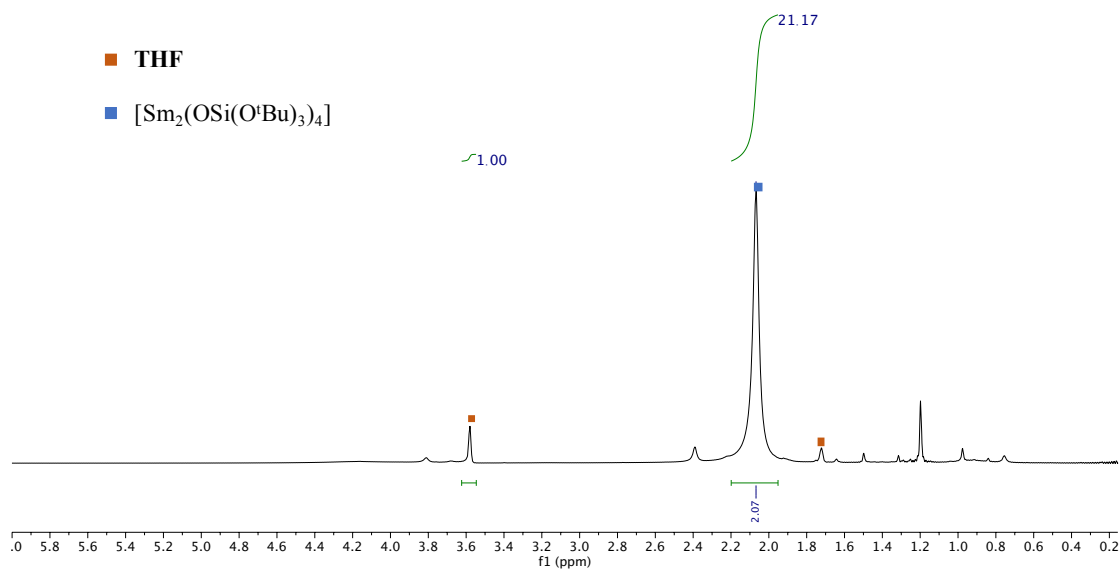

**Figure S 13:**  $^1\text{H}$  NMR spectrum of **1-Sm** (THF- $d_8$ , 400 MHz, 298 K) after 5 days at room temperature in THF- $d_8$ .



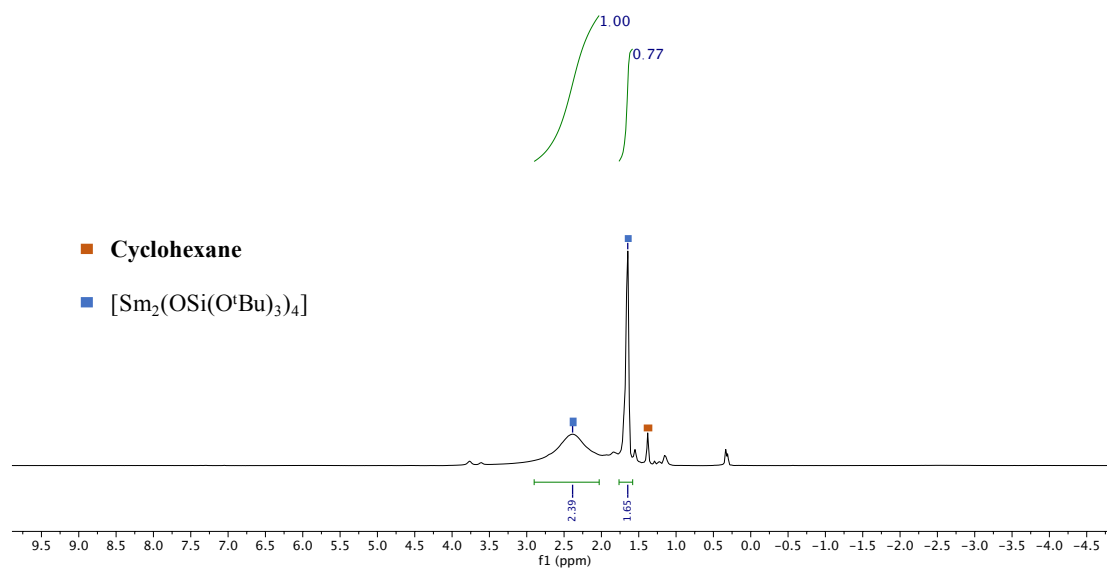

**Figure S 14:** <sup>1</sup>H NMR spectrum of **1-Sm** (C<sub>6</sub>D<sub>12</sub>, 400 MHz, 298 K).

### Reactivity studies

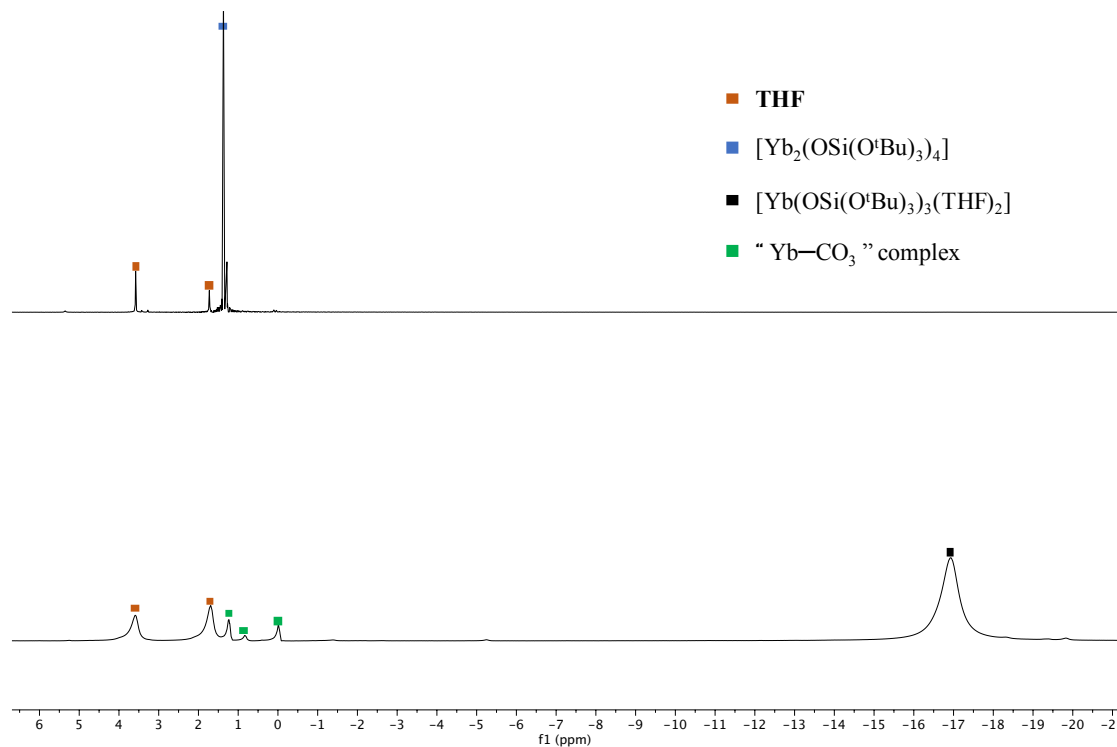

**Figure S 15:** <sup>1</sup>H NMR spectrum of the reaction mixture before the addition of ~5 equivalents <sup>13</sup>CO<sub>2</sub> to a THF-d<sub>8</sub> solution of **1-Yb** at room temperature (above) and 10 days after addition (below) (THF-d<sub>8</sub>, 400 MHz, 298 K).

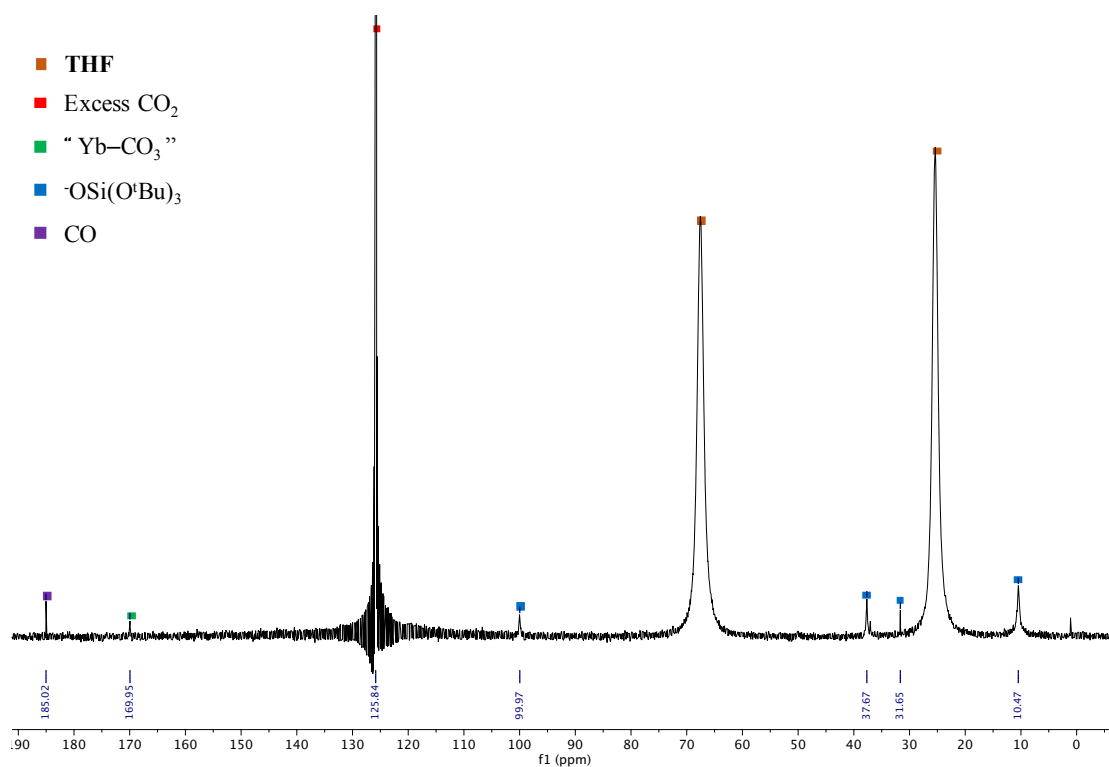

**Figure S 16:**  $^{13}\text{C}$  NMR spectrum of the reaction mixture after addition of  $\sim 5$  equivalents  $^{13}\text{CO}_2$  to a THF- $d_8$  solution of **1-Yb** at room temperature (THF- $d_8$ , 400 MHz, 298 K).

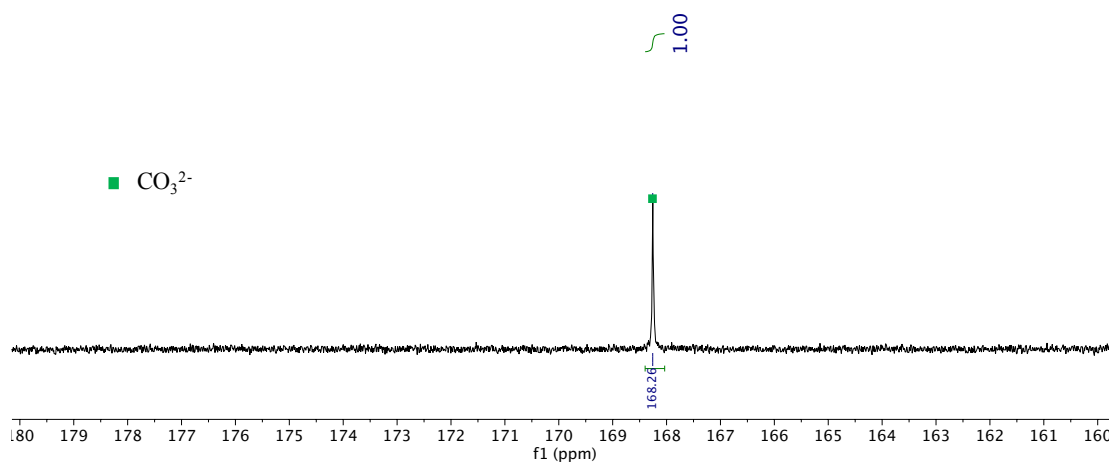

**Figure S 17:** Quantitative  $^{13}\text{C}$  NMR spectrum of the reaction mixture after addition of  $\sim 5$  equivalents  $^{13}\text{CO}_2$  to a THF- $d_8$  solution of **1-Yb** at room temperature after removal of excess  $^{13}\text{CO}_2$  and solvent ( $\text{D}_2\text{O}$ , 600 MHz, 298 K, pD-13).

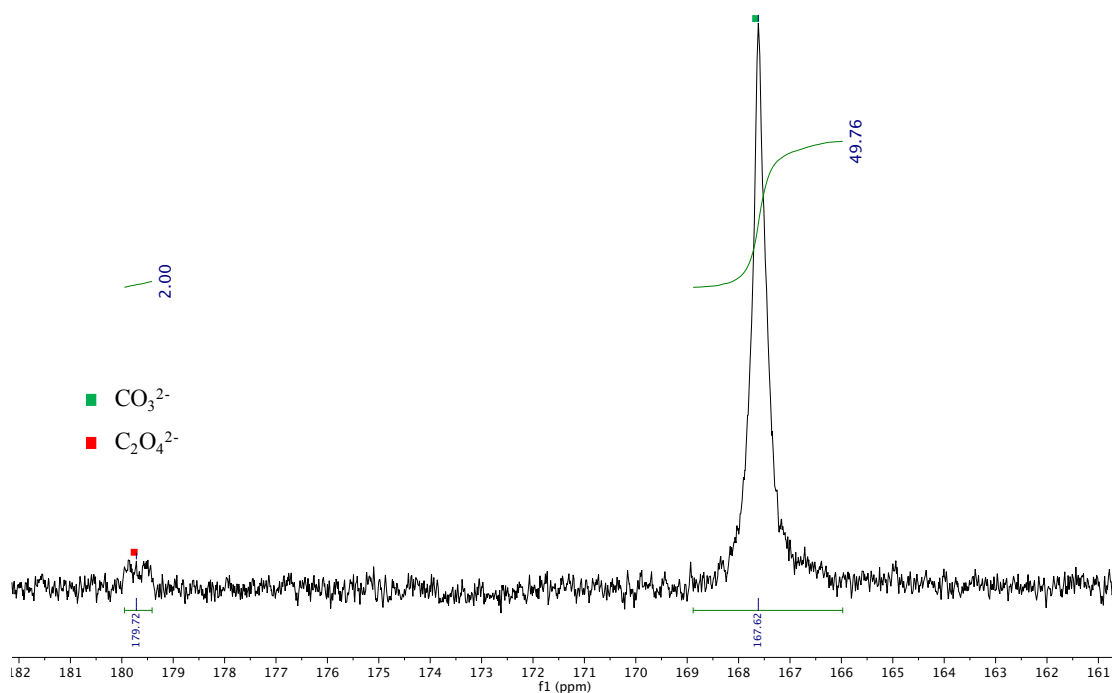

**Figure S 18:** Quantitative  $^{13}\text{C}$  NMR spectrum of the reaction mixture after addition of  $\sim 5$  equivalents  $^{13}\text{CO}_2$  to a  $\text{C}_6\text{D}_{12}$  solution of **1-Yb** at room temperature after removal of excess  $^{13}\text{CO}_2$  and solvent ( $\text{D}_2\text{O}$ , 600 MHz, 298 K, pD-13).

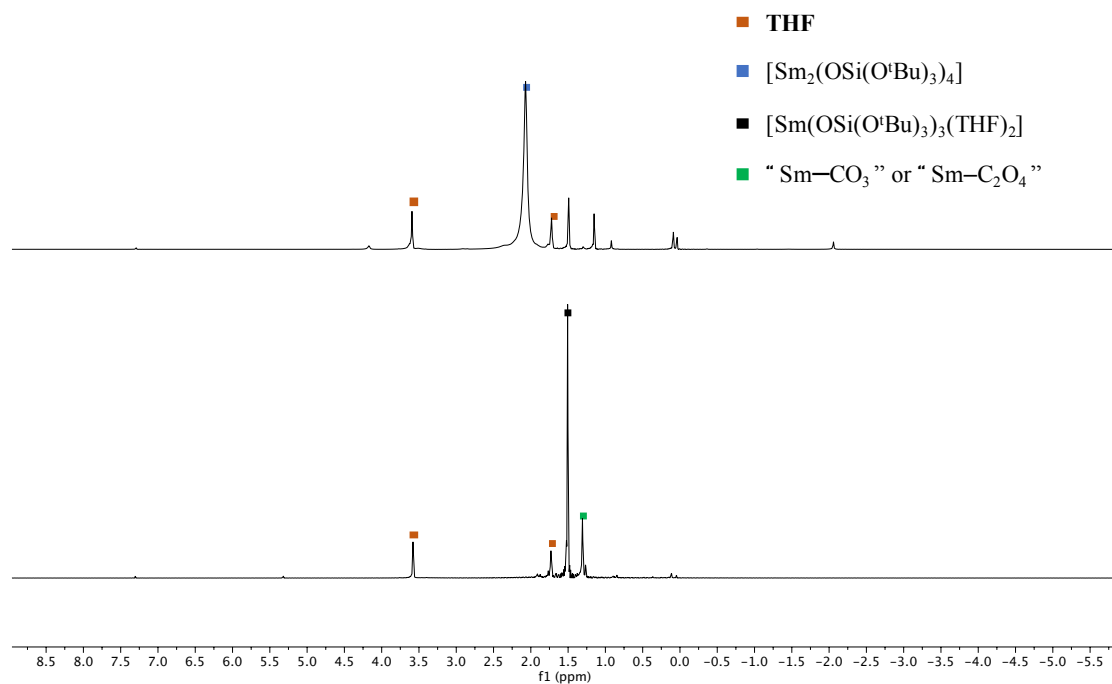

**Figure S 19:**  $^1\text{H}$  NMR spectrum of the reaction mixture before the addition of  $\sim 5$  equivalents  $^{13}\text{CO}_2$  to a  $\text{THF-d}_8$  solution of **1-Sm** at room temperature (above) and 2 days after addition (below) ( $\text{THF-d}_8$ , 400 MHz, 298 K).

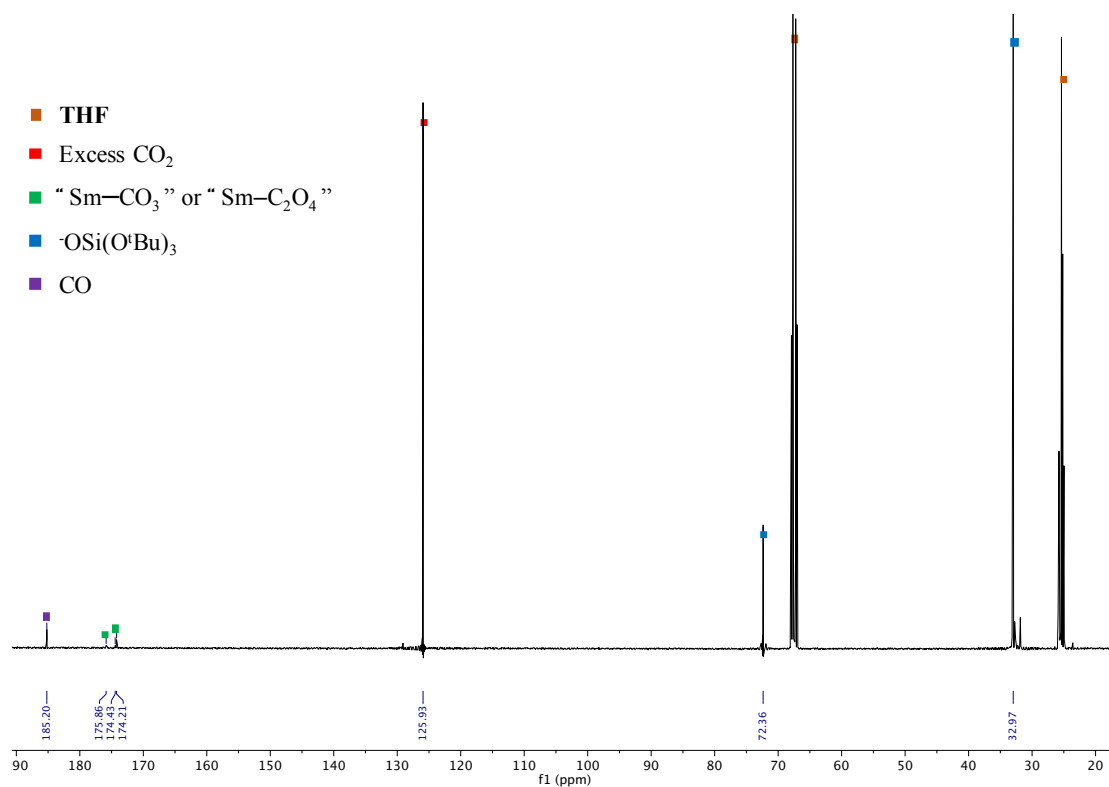

**Figure S 20:** <sup>13</sup>C NMR spectrum of the reaction mixture 2 days after addition of ~5 equivalents <sup>13</sup>CO<sub>2</sub> to a THF-d<sub>8</sub> solution of **1-Sm** at room temperature (THF-d<sub>8</sub>, 400 MHz, 298 K).

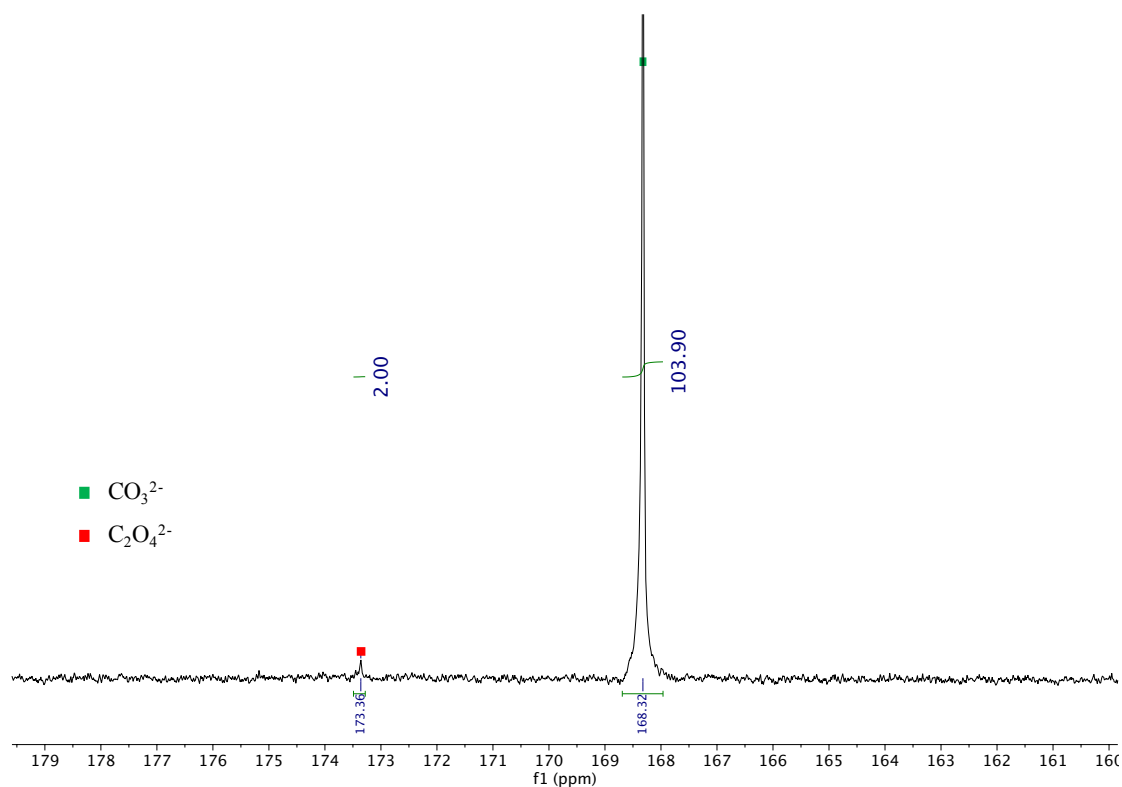

**Figure S 21:** Quantitative <sup>13</sup>C NMR spectrum of the reaction mixture after addition of ~5 equivalents <sup>13</sup>CO<sub>2</sub> to a THF-d<sub>8</sub> solution of **1-Sm** at room temperature, after 10 days, after removal of excess <sup>13</sup>CO<sub>2</sub> and solvent (D<sub>2</sub>O, 600 MHz, 298 K, pD-13).

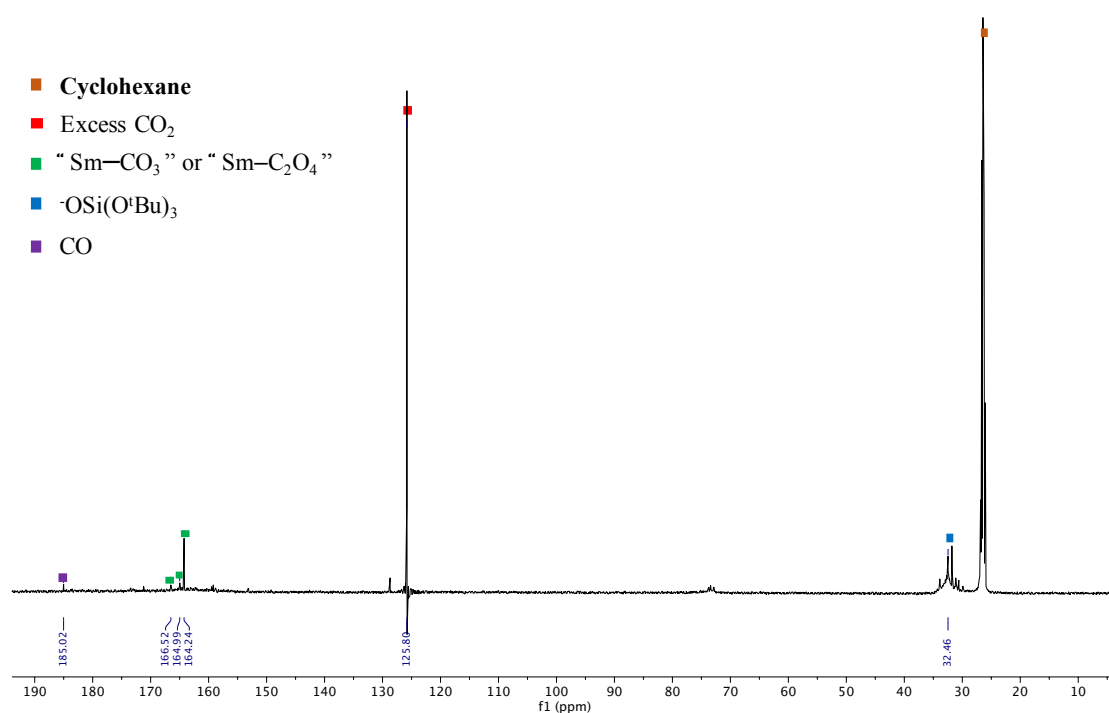

**Figure S 22:** <sup>13</sup>C NMR spectrum of the reaction mixture 2 weeks after addition of ~5 equivalents <sup>13</sup>CO<sub>2</sub> to a C<sub>6</sub>D<sub>12</sub> solution of **1-Sm** at room temperature (C<sub>6</sub>D<sub>12</sub>, 400 MHz, 298 K).

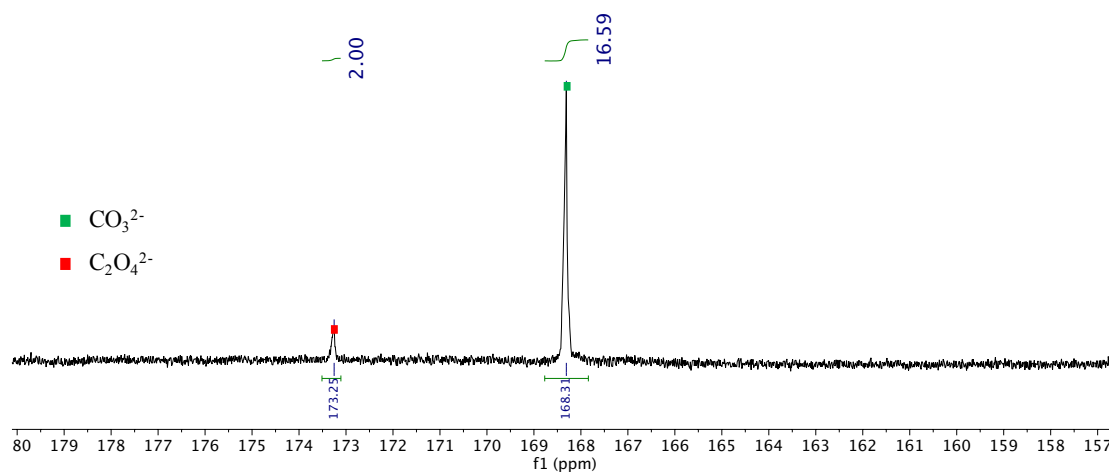

**Figure S 23:** Quantitative <sup>13</sup>C NMR spectrum of the reaction mixture after addition of ~5 equivalents <sup>13</sup>CO<sub>2</sub> to a C<sub>6</sub>D<sub>12</sub> solution of **1-Sm** at room temperature after removal of excess <sup>13</sup>CO<sub>2</sub> and solvent (D<sub>2</sub>O, 600 MHz, 298 K, pD-13).

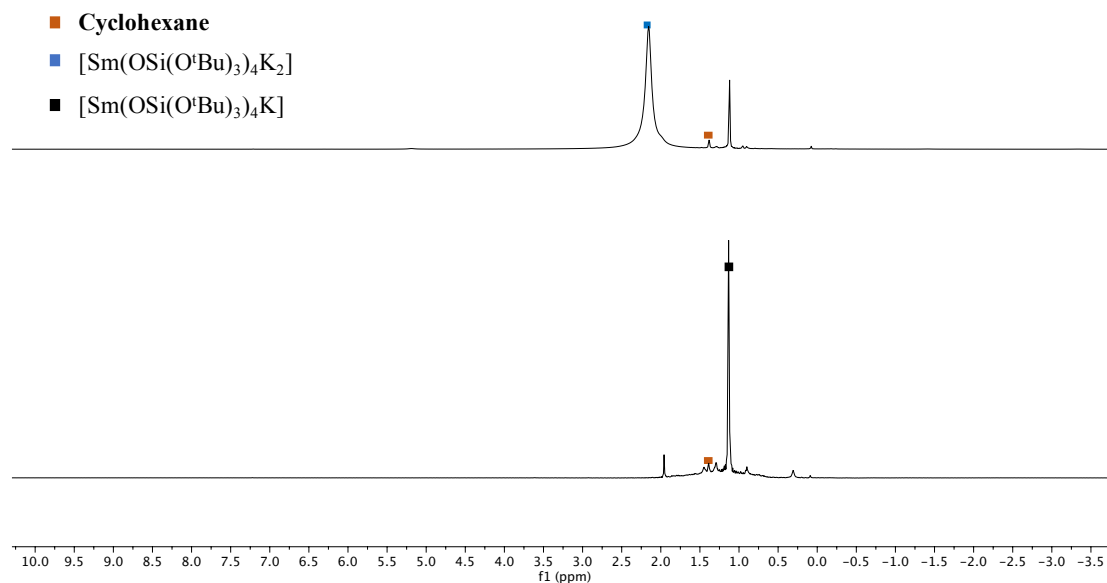

**Figure S 24:** <sup>1</sup>H NMR spectrum of the reaction mixture before the addition of ~5 equivalents <sup>13</sup>CO<sub>2</sub> to a C<sub>6</sub>D<sub>12</sub> solution of [SmL<sub>4</sub>K<sub>2</sub>] at room temperature (above) and after addition (below) (C<sub>6</sub>D<sub>12</sub>, 400 MHz, 298 K).

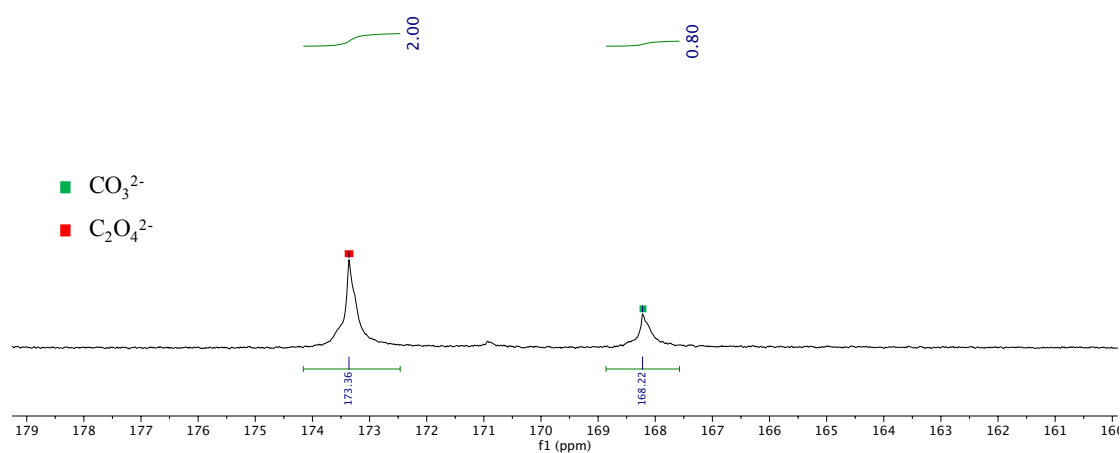

**Figure S 25:** Quantitative <sup>13</sup>C NMR spectrum of the reaction mixture after addition of ~5 equivalents <sup>13</sup>CO<sub>2</sub> to a C<sub>6</sub>D<sub>12</sub> solution of [SmL<sub>4</sub>K<sub>2</sub>] at room temperature after removal of excess <sup>13</sup>CO<sub>2</sub> and solvent (D<sub>2</sub>O, 600 MHz, 298 K, pD-12).

### Diffusion coefficient measurement.

DOSY NMR was used to measure the diffusion coefficients ( $D$ ) of **1-Yb** in  $C_6D_{12}$ . The values of the measured coefficient diffusion can be used to estimate the spherical hydrodynamic radius  $r_{sph}$  (Stokes radius) of the complex in solution from the Stokes-Einstein equation.

$$r_{sph} = \frac{k_B T}{6\pi\eta D}$$

$\eta$  = viscosity of the medium (0.86 mPa.s for cyclohexane at 298 K)

$k_B$  = Boltzmann constant ( $1.38 \times 10^{-23} \text{ m}^2 \cdot \text{kg} \cdot \text{s}^{-2} \cdot \text{K}^{-1}$ )

$T$ : absolute temperature (K)

$D$ : diffusion coefficient ( $\text{m}^2 \cdot \text{s}^{-1}$ )

|                            | Diffusion coefficient ( $\text{m}^2 \cdot \text{s}^{-1}$ ) | $r_{sph}$ (Å) |
|----------------------------|------------------------------------------------------------|---------------|
| <b>1-Yb</b> in $C_6D_{12}$ | $3.98 \times 10^{-10}$                                     | <b>6.37</b>   |

**Table S1:** Diffusion coefficient of **1-Yb** in  $C_6D_{12}$  measured by DOSY NMR and radius of **1-Yb** estimated from the Stokes-Einstein equation.

The value of the radius  $r_{sph}$  obtained by DOSY NMR spectroscopy for **1-Yb** is consistent with the value obtained from the solid-state structure of the dimeric **1-Sm** (~ 6 Å).

## B. IR spectrum

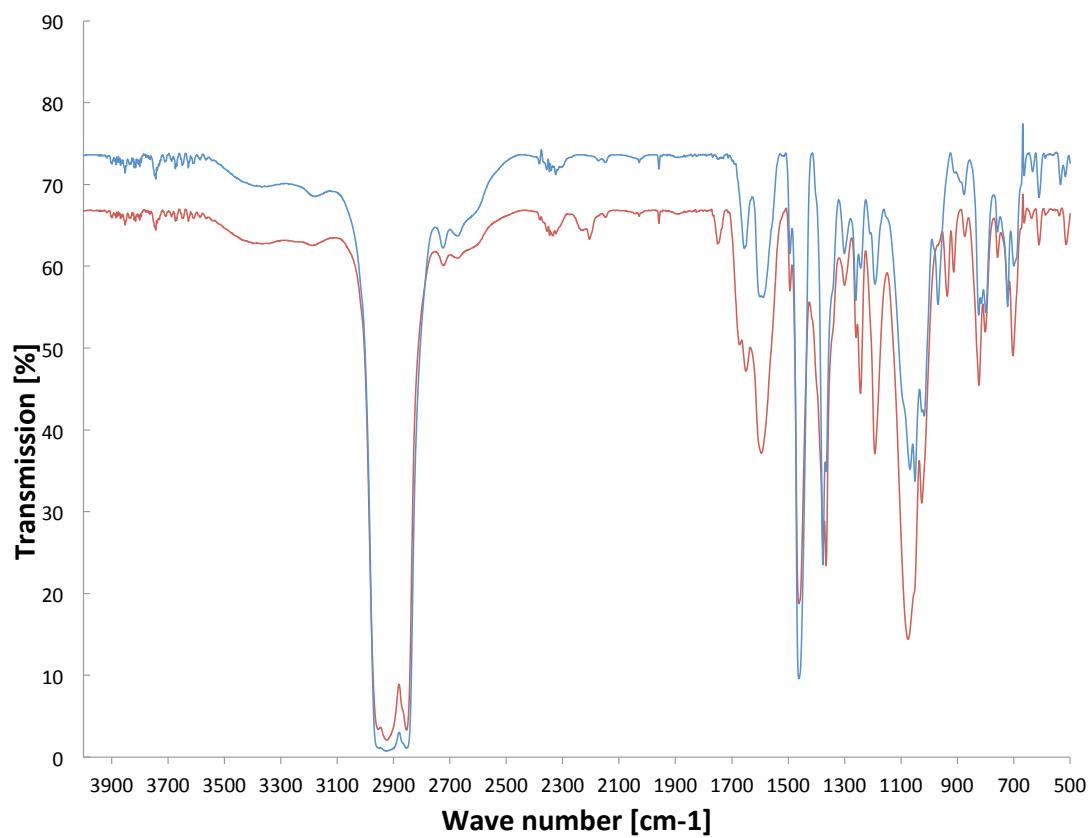

**Figure S 26:** Infrared spectra of complex **1-Yb** (blue) and of the residue of the reaction mixture after addition of  $\sim 5$  equivalents CO<sub>2</sub> to a n-hexane solution of **1-Yb** at room temperature (red).



### C. X-ray Crystal Structure Determination Details

Bragg-intensities of **1-Sm**, **3** and **4** were collected at low temperature (See Table S1) using CuK $\alpha$  radiation. A Rigaku SuperNova dual system diffractometer with an Atlas S2 CCD detector was used for compounds **1-Sm** and **4**, and one equipped with an Atlas CCD detector for compound **3**. The datasets were reduced and corrected for absorption, with the help of a set of faces enclosing the crystals as snugly as possible, with CrysAlis<sup>Pro</sup>.<sup>1</sup>

The X-ray diffraction data of **2** were measured at 120(2) K using MoK $\alpha$  radiation on a Bruker APEX II CCD kappa diffractometer. The datasets were reduced by EvalCCD<sup>2</sup> and corrected for absorption by modelling an empirical transmission surface as sampled by multiple symmetry-equivalent and/or azimuth rotation-equivalent intensity measurements by real spherical harmonic functions of even order.<sup>3</sup>

The solutions and refinements of the structures were performed by the latest available version of ShelXT<sup>4</sup> and ShelXL.<sup>5</sup> All non-hydrogen atoms were refined anisotropically using full-matrix least-squares based on  $|F|^2$ , but the hydrogen atoms were placed at calculated positions by means of the “riding” model where each H-atom was assigned a fixed isotropic displacement parameter with a value equal to 1.2  $U_{eq}$  of its parent C-atom (1.5  $U_{eq}$  for the methyl groups). Crystallographic and refinement data are summarized in Table S1. CCDC numbers 1895385-1895388 for compounds **1-Sm** (1895385), **2**, (1895387), **3** (1895386), and **4** (1895388), contain the supplementary crystallographic data for this paper. These data can be obtained, free of charge, from The Cambridge Crystallographic Data Centre via [www.ccdc.cam.ac.uk/structures](http://www.ccdc.cam.ac.uk/structures).

In the structure of **3**, a solvent mask was calculated with the help of the solvent-masking program in OLEX2<sup>6</sup> and 55.0 electrons were found in a volume of 483.0 Å<sup>3</sup> in three voids. This is consistent with the presence of one hexane solvent molecule per formula unit which accounts for 50.0 electrons.

In the case of **4**, a calculated solvent mask found 356.0 electrons in a volume of 2524.0 Å<sup>3</sup> in two voids. This is consistent with the presence of two hexane solvent molecules per formula unit which account for 400.0 electrons.

**Table S2:** Crystallographic parameters for complexes 1-4.

| Compound                                                         | [Sm <sub>2</sub> L <sub>4</sub> ] (1-Sm)                                         | [Yb <sub>2</sub> L <sub>4</sub> (μ-OME) <sub>2</sub> (DME) <sub>2</sub> ] (2)    | [Yb <sub>4</sub> L <sub>8</sub> (C <sub>2</sub> O <sub>4</sub> )] (3)            | [Sm <sub>4</sub> L <sub>8</sub> (CO <sub>3</sub> ) <sub>2</sub> ] (4)            |
|------------------------------------------------------------------|----------------------------------------------------------------------------------|----------------------------------------------------------------------------------|----------------------------------------------------------------------------------|----------------------------------------------------------------------------------|
| Formula                                                          | C <sub>48</sub> H <sub>108</sub> O <sub>16</sub> Si <sub>4</sub> Sm <sub>2</sub> | C <sub>58</sub> H <sub>134</sub> O <sub>22</sub> Si <sub>4</sub> Yb <sub>2</sub> | C <sub>98</sub> H <sub>216</sub> O <sub>36</sub> Si <sub>8</sub> Yb <sub>4</sub> | C <sub>98</sub> H <sub>216</sub> O <sub>38</sub> Si <sub>8</sub> Sm <sub>4</sub> |
| Crystal size [mm]                                                | 0.38 x 0.29 x 0.25                                                               | 0.25×0.16×0.07                                                                   | 0.38×0.32×0.28                                                                   | 0.19×0.14×0.07                                                                   |
| Crystal system                                                   | Triclinic                                                                        | Triclinic                                                                        | Triclinic                                                                        | Monoclinic                                                                       |
| Space group                                                      | <i>P</i> $\bar{1}$                                                               | <i>P</i> $\bar{1}$                                                               | <i>P</i> $\bar{1}$                                                               | <i>C</i> 2/ <i>c</i>                                                             |
| V [Å <sup>3</sup> ]                                              | 3355.4(4)                                                                        | 2022.8(6)                                                                        | 3600.41(12)                                                                      | 15088.5(16)                                                                      |
| <i>a</i> [Å]                                                     | 12.9099(7)                                                                       | 9.5823(14)                                                                       | 13.1265(2)                                                                       | 34.217(2)                                                                        |
| <i>b</i> [Å]                                                     | 14.0475(9)                                                                       | 14.4327(18)                                                                      | 15.6137(3)                                                                       | 14.6315(7)                                                                       |
| <i>c</i> [Å]                                                     | 20.4106(8)                                                                       | 16.330(3)                                                                        | 18.8708(4)                                                                       | 30.140(2)                                                                        |
| $\alpha$ [°]                                                     | 88.122(4)                                                                        | 64.364(11)                                                                       | 72.6073(17)                                                                      | 90                                                                               |
| $\beta$ [°]                                                      | 88.122(4)                                                                        | 85.709(14)                                                                       | 80.2421(15)                                                                      | 90.606(6)                                                                        |
| $\gamma$ [°]                                                     | 65.093(6)                                                                        | 83.694(12)                                                                       | 79.3717(13)                                                                      | 90                                                                               |
| Z                                                                | 2                                                                                | 1                                                                                | 1                                                                                | 4                                                                                |
| Absorption coefficient [mm <sup>-1</sup> ]                       | 14.134                                                                           | 2.418                                                                            | 5.768                                                                            | 12.626                                                                           |
| F(000)                                                           | 1408                                                                             | 854                                                                              | 1484                                                                             | 5872                                                                             |
| T(K)                                                             | 100.00(10) K                                                                     | 120(2)                                                                           | 140.01(10)                                                                       | 140.00(10)                                                                       |
| Total no. reflections                                            | 24633                                                                            | 24632                                                                            | 38077                                                                            | 37370                                                                            |
| Unique reflexions [ <i>R</i> <sub>int</sub> ]                    | 13518 [0.0548]                                                                   | 7397 [0.0772]                                                                    | 14966 [0.0185]                                                                   | 12866 [0.0919]                                                                   |
| Final <i>R</i> <sub>1</sub> [ <i>I</i> >2 $\sigma$ ( <i>I</i> )] | 0.0661                                                                           | 0.0564                                                                           | 0.0215                                                                           | 0.0729                                                                           |
| Largest diff. peak and hole [eÅ <sup>-3</sup> ]                  | 2.033 and -1.416                                                                 | 0.915 and -0.778                                                                 | 0.596 and -0.796                                                                 | 2.324 and -2.707                                                                 |
| GOOF                                                             | 1.024                                                                            | 1.118                                                                            | 1.049                                                                            | 1.055                                                                            |

## References

- [1] *CrysAlis<sup>Pro</sup>* Software System, Rigaku Oxford Diffraction, 2015.
- [2] A. J. M. Duisenberg, L. M. J. Kroon-Batenburg, A. M. M. Schreurs, *J. Appl. Crystallogr.*, 2003, **36**, 220-229.
- [3] R. H. Blessing, *Acta Cryst.*, 1995, **A51**, 33-38.
- [4] Sheldrick, G.M., ShelXT-Integrated space-group and crystal-structure determination, *Acta Cryst.*, 2015, **A71**, 3-8.
- [5] Sheldrick, G.M., Crystal structure refinement with ShelXL, *Acta Cryst.*, 2015, **C71**, 3-8.
- [6] O.V. Dolomanov, L.J. Bourhis, R.J. Gildea, J.A.K. Howard, H. Puschmann, Olex2: A complete structure solution, refinement and analysis program, *J. Appl. Cryst.*, 2009, **42**, 339-341.

## D. Computational Details

Calculations were performed with the GAUSSIAN 09 suite of programs [1]. Density Functional Theory (DFT) was applied by the mean of the B3PW91 hybrid functional [2]. Following our previous work, two kinds of relativistic effective core potential (RECPs) have been used to describe the lanthanide centre: small-core Stuttgart-Dresden RECP [3] (which includes  $1s$ ,  $2s$ ,  $2p$ ,  $3s$ ,  $3p$  and  $3d$  electrons) and large-core Stuttgart-Dresden RECP [4] (which includes, in addition,  $4s$ ,  $4p$ ,  $4d$  and  $4f$  electrons), depending on the size of the system. The large-core RECP was chosen according to the formal oxidation state of the lanthanide. The RECPs were used in combination with their optimized valence basis sets supplemented by an  $f$  polarization function for the large-core RECP. The Stuttgart-Dresden relativistic effective core potential SDD [5] was employed for silicon centers in association with its valence basis set and a  $d$  polarization function, while the 6-31G(d) basis set was used for all other atoms [6]. Geometry optimizations were performed on the whole system and without any symmetry constraints. All stationary points have been identified for the minimum (number of imaginary frequencies,  $\text{Nimag} = 0$ ). The NBO analysis [7] was carried out on the optimized structures using the module included in the Gaussian package and the Chemcraft graphical program was used for the 3D representations of the structures and the orbital plots [8].

[1] Frisch, M. J.; Trucks, G. W.; Schlegel, H. B.; Scuseria, G. E.; Robb, M. A.; Cheeseman, J. R.; Montgomery, J. A., Jr.; Vreven, T.; Kudin, K. N.; Burant, J. C.; Millam, J. M.; Iyengar, S. S.; Tomasi, J.; Barone, V.; Mennucci, B.; Cossi, M.; Scalmani, G.; Rega, N.; Petersson, G. A.; Nakatsuji, H.; Hada, M.; Ehara, M.; Toyota, K.; Fukuda, R.; Hasegawa, J.; Ishida, M.; Nakajima, T.; Honda, Y.; Kitao, O.; Nakai, H.; Klene, M.; Li, X.; Knox, J. E.; Hratchian, H. P.; Cross, J. B.; Bakken, V.; Adamo, C.; Jaramillo, J.; Gomperts, R.; Stratmann, R. E.; Yazyev, O.; Austin, A. J.; Cammi, R.; Pomelli, C.; Ochterski, J. W.; Ayala, P. Y.; Morokuma, K.; Voth, G. A.; Salvador, P.; Dannenberg, J. J.; Zakrzewski, V. G.; Dapprich, S.; Daniels, A. D.; Strain, M. C.; Farkas, O.; Malick, D. K.; Rabuck, A. D.; Raghavachari, K.; Foresman, J. B.; Ortiz, J. V.; Cui, Q.; Baboul, A. G.; Clifford, S.; Cioslowski, J.; Stefanov, B. B.; Liu, G.; Liashenko, A.; Piskorz, P.; Komaromi, I.; Martin, R. L.; Fox, D. J.; Keith, T.; Al-Laham, M. A.; Peng, C. Y.; Nanayakkara, A.; Challacombe, M.; Gill, P. M. W.; Johnson, B.; Chen, W.; Wong, M. W.; Gonzalez, C.; Pople, J. A. Gaussian 03, Revision E.01; Gaussian, Inc.: Wallingford, CT, **2004**.

[2] Becke, A. D. *J. Chem. Phys.* **1993**, *98*, 5648–5662; Perdew, J. P.; Wang, Y. *Phys. Rev. B* **1992**, *45*, 13244–13249.

[3] Dolg, M.; Stoll, H.; Preuss, H. *J. Chem. Phys.* **1989**, *90*, 1730–1734; Cao, X.; Dolg, M. *J. Chem. Phys.* **2001**, *115*, 7348–7355.

[4] Dolg, M.; Stoll, H.; Savin, A.; Preuss, H. *Theor. Chim. Acta* **1989**, *75*, 173–194; Dolg, M.; Stoll, H.; Preuss, H. *Theor. Chim. Acta* **1993**, *85*, 441–450.

- [5] Bergner, A.; Dolg, M.; Kuechle, W.; Stoll, H.; Preuss, H. *Mol. Phys.* **1993**, *80*, 1431–1441.
- [6] W. J. Hehre, R. Ditchfield, J. A. Pople *J. Chem. Phys.* **56**, 2257–2261 (1972); P. C. Hariharan and J. A. Pople *Theor. Chim. Acta* **28**, 213–222 (1973).
- [7] A. E. Reed, L. A. Curtiss, F. Weinhold, *Chem. Rev.* **88**, 899–926 (1988).
- [8] G. A. Zhurko, *Home Page: a set of graphical tools for facilitating working with quantum chemistry computations* (<http://www.chemcraftprog.com>).

### Cartesian coordinates of all optimized structures

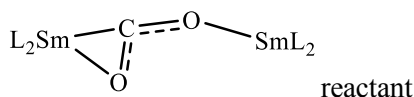

|    |             |            |             |
|----|-------------|------------|-------------|
| Sm | 25.06485500 | 6.09940500 | 17.12999500 |
| Sm | 21.61352100 | 2.72065500 | 14.19212400 |
| Si | 25.97768800 | 5.71542900 | 20.08169500 |
| Si | 18.92178100 | 3.80176300 | 15.34679700 |
| O  | 24.36127800 | 4.28296100 | 16.14624500 |
| O  | 23.03278300 | 2.50766800 | 16.10305200 |
| O  | 24.58702800 | 5.93243000 | 19.28583900 |
| O  | 26.63883000 | 7.02224800 | 20.86936100 |
| O  | 27.00551400 | 5.55532300 | 18.68503700 |
| O  | 26.06872700 | 4.41750000 | 21.11154200 |
| O  | 20.05558600 | 4.32575400 | 14.32213400 |
| O  | 17.33886800 | 3.91832300 | 14.83709300 |
| O  | 19.46950600 | 2.15981100 | 15.47970700 |
| O  | 18.94725400 | 4.33697100 | 16.92067400 |
| C  | 23.42400200 | 3.59218000 | 15.55953400 |
| C  | 26.20336400 | 7.58856900 | 22.13765800 |
| C  | 24.68099900 | 7.47306900 | 22.29827400 |
| H  | 24.17411100 | 7.93615700 | 21.44550700 |
| H  | 24.36817300 | 7.97556500 | 23.22111400 |
| H  | 24.38004400 | 6.42097000 | 22.35628900 |
| C  | 26.62436600 | 9.06330400 | 22.08519700 |
| H  | 27.70662900 | 9.13277000 | 21.92895800 |
| H  | 26.36521800 | 9.56551500 | 23.02420300 |
| H  | 26.11284700 | 9.56430800 | 21.25607200 |
| C  | 26.93216900 | 6.85676100 | 23.27268400 |
| H  | 26.67426300 | 5.79336700 | 23.25221100 |
| H  | 26.64582800 | 7.28304000 | 24.24145400 |
| H  | 28.01562400 | 6.96259700 | 23.14560800 |
| C  | 28.46767900 | 5.43304400 | 18.64160400 |
| C  | 29.02680800 | 6.81237200 | 18.27432100 |
| H  | 28.62264300 | 7.14106100 | 17.30976600 |
| H  | 30.11951700 | 6.77245600 | 18.19868600 |
| H  | 28.74218000 | 7.53552100 | 19.04525500 |
| C  | 29.02422000 | 4.97159200 | 19.99431300 |
| H  | 28.80163000 | 5.71099300 | 20.76872600 |
| H  | 30.11138400 | 4.85822000 | 19.91097200 |
| H  | 28.58458700 | 4.01299500 | 20.28327500 |
| C  | 28.77961700 | 4.38905800 | 17.56309800 |
| H  | 28.33643600 | 3.42608700 | 17.83790800 |
| H  | 29.86351000 | 4.26816500 | 17.45698700 |
| H  | 28.37297100 | 4.70011100 | 16.59494800 |

|    |             |             |             |
|----|-------------|-------------|-------------|
| C  | 25.33460700 | 3.15812900  | 21.03349800 |
| C  | 25.95216800 | 2.28280300  | 22.13286500 |
| H  | 27.01758300 | 2.12551300  | 21.93061400 |
| H  | 25.44678900 | 1.31122900  | 22.17006200 |
| H  | 25.84652500 | 2.77929500  | 23.10367500 |
| C  | 25.52584400 | 2.50164200  | 19.66043800 |
| H  | 25.04623700 | 3.08755800  | 18.86933900 |
| H  | 25.06779400 | 1.50578600  | 19.66119100 |
| H  | 26.59405700 | 2.39691900  | 19.43947100 |
| C  | 23.84864100 | 3.41250000  | 21.31648000 |
| H  | 23.73262200 | 3.87910900  | 22.30158700 |
| H  | 23.30059700 | 2.46316300  | 21.30758400 |
| H  | 23.43179400 | 4.07522100  | 20.55206900 |
| C  | 16.85055600 | 3.90956900  | 13.46809100 |
| C  | 15.32738600 | 3.76347500  | 13.59271900 |
| H  | 14.86245600 | 3.77346200  | 12.60027400 |
| H  | 14.92581900 | 4.59294000  | 14.18513400 |
| H  | 15.08310000 | 2.82099700  | 14.09530100 |
| C  | 17.21290400 | 5.23802300  | 12.79027800 |
| H  | 16.78823500 | 6.07173000  | 13.36121400 |
| H  | 16.80734500 | 5.26398900  | 11.77181900 |
| H  | 18.30155900 | 5.34500900  | 12.75036000 |
| C  | 17.43694400 | 2.72667600  | 12.68547300 |
| H  | 17.24535900 | 1.79013200  | 13.22041200 |
| H  | 18.51648400 | 2.85639000  | 12.55660300 |
| H  | 16.97493600 | 2.67196600  | 11.69276100 |
| C  | 19.04981400 | 1.15223000  | 16.46061200 |
| C  | 17.55370300 | 1.30130900  | 16.76382600 |
| H  | 17.35370100 | 2.27199000  | 17.22681200 |
| H  | 17.24536100 | 0.50777600  | 17.45462800 |
| H  | 16.96930400 | 1.22139000  | 15.84189400 |
| C  | 19.32161200 | -0.20737300 | 15.80715500 |
| H  | 19.03993600 | -1.01493300 | 16.49243300 |
| H  | 20.38650200 | -0.31149400 | 15.57228200 |
| H  | 18.74061900 | -0.30303200 | 14.88341100 |
| C  | 19.89182700 | 1.33290900  | 17.72920900 |
| H  | 20.95815300 | 1.25596200  | 17.48994600 |
| H  | 19.63216000 | 0.56086200  | 18.46340500 |
| H  | 19.70275800 | 2.32251500  | 18.15425100 |
| C  | 18.51576800 | 5.63084600  | 17.42218500 |
| C  | 19.38111800 | 5.89772100  | 18.66120100 |
| H  | 19.25078400 | 5.08560800  | 19.38496300 |
| H  | 19.09150300 | 6.84562100  | 19.12896700 |
| H  | 20.43739500 | 5.94787200  | 18.37468200 |
| C  | 18.73200800 | 6.73061500  | 16.37363300 |
| H  | 19.78123900 | 6.75197700  | 16.06205500 |
| H  | 18.46336400 | 7.70476400  | 16.79894500 |
| H  | 18.10492300 | 6.54757900  | 15.49392400 |
| C  | 17.03332200 | 5.52770300  | 17.80704000 |
| H  | 16.68505100 | 6.47782900  | 18.22937800 |
| H  | 16.90095400 | 4.73757700  | 18.55501100 |
| H  | 16.43896400 | 5.28283900  | 16.92098900 |
| Si | 22.74771800 | 1.11730400  | 11.70002700 |
| Si | 24.57081200 | 8.56615900  | 15.27292300 |
| O  | 21.79937300 | 2.39881200  | 11.98065700 |

|   |             |             |             |
|---|-------------|-------------|-------------|
| O | 24.31880800 | 1.38759200  | 11.21850600 |
| O | 22.88247100 | 0.54628900  | 13.31876100 |
| O | 22.15050800 | -0.03513500 | 10.64919500 |
| O | 23.99984700 | 7.97940700  | 16.67316600 |
| O | 23.67976200 | 8.34969500  | 13.89332500 |
| O | 25.89893500 | 7.46118300  | 15.08582900 |
| O | 25.06064300 | 10.15649200 | 15.29098400 |
| C | 24.77684200 | 1.79231500  | 9.90157400  |
| C | 23.75010900 | 2.70257000  | 9.21142200  |
| H | 23.52115300 | 3.56307600  | 9.84837100  |
| H | 24.15297300 | 3.05693300  | 8.25512200  |
| H | 22.82307100 | 2.15231000  | 9.01768900  |
| C | 26.08577500 | 2.55713800  | 10.14484500 |
| H | 26.79727700 | 1.91141400  | 10.67151900 |
| H | 26.52483300 | 2.87192700  | 9.19108900  |
| H | 25.88737700 | 3.44092800  | 10.76104000 |
| C | 25.03689500 | 0.53014400  | 9.06730700  |
| H | 24.10547900 | -0.03264800 | 8.95269800  |
| H | 25.42380200 | 0.80286600  | 8.07812900  |
| H | 25.77440800 | -0.10182800 | 9.57533600  |
| C | 23.85312200 | -0.41799800 | 13.84899400 |
| C | 25.17699900 | 0.31073500  | 14.11401100 |
| H | 25.01006200 | 1.12096000  | 14.83108300 |
| H | 25.90831600 | -0.39116400 | 14.53270400 |
| H | 25.56146200 | 0.72703700  | 13.17909400 |
| C | 23.26226800 | -0.93711000 | 15.16448000 |
| H | 22.31147300 | -1.44826200 | 14.97589100 |
| H | 23.95743200 | -1.64635100 | 15.62852900 |
| H | 23.10379500 | -0.10039700 | 15.85346200 |
| C | 24.04490000 | -1.56989300 | 12.85454500 |
| H | 24.46381700 | -1.19624300 | 11.91511400 |
| H | 24.73474700 | -2.30681600 | 13.28251300 |
| H | 23.08642500 | -2.05635000 | 12.64668800 |
| C | 20.76410700 | -0.37453500 | 10.39394200 |
| C | 20.01418700 | -0.63080800 | 11.70880100 |
| H | 19.95520900 | 0.29176500  | 12.29562100 |
| H | 18.99433400 | -0.97248500 | 11.49646000 |
| H | 20.53427800 | -1.39575200 | 12.29504400 |
| C | 20.81469600 | -1.66069700 | 9.55667200  |
| H | 21.30899800 | -2.45585500 | 10.12557600 |
| H | 19.80072000 | -1.98215500 | 9.29241600  |
| H | 21.38401300 | -1.47807100 | 8.63874700  |
| C | 20.09854300 | 0.75872100  | 9.60051000  |
| H | 20.64004500 | 0.91821100  | 8.66096100  |
| H | 19.05887700 | 0.49782800  | 9.36922300  |
| H | 20.12180700 | 1.68225700  | 10.18755000 |
| C | 22.48221200 | 9.06562500  | 13.47433200 |
| C | 21.62380400 | 9.45291100  | 14.68548100 |
| H | 22.17111800 | 10.14165900 | 15.33882100 |
| H | 20.70787900 | 9.94919300  | 14.34377100 |
| H | 21.35229800 | 8.56006000  | 15.25701100 |
| C | 21.72105000 | 8.08789000  | 12.56975200 |
| H | 21.44978300 | 7.18814600  | 13.13235500 |
| H | 20.80846200 | 8.56001800  | 12.18819900 |
| H | 22.35268400 | 7.79755700  | 11.72268500 |

|   |             |             |             |
|---|-------------|-------------|-------------|
| C | 22.91597100 | 10.31031500 | 12.68861300 |
| H | 23.53308600 | 10.01035300 | 11.83404300 |
| H | 22.03443900 | 10.84648900 | 12.31753800 |
| H | 23.50030900 | 10.97319900 | 13.33458200 |
| C | 26.62476900 | 7.17002500  | 13.83992400 |
| C | 25.80359700 | 6.17238100  | 13.01401100 |
| H | 24.84982400 | 6.62371400  | 12.72976400 |
| H | 26.36045700 | 5.88975100  | 12.11267600 |
| H | 25.60018100 | 5.26968100  | 13.60182400 |
| C | 27.95798800 | 6.54633800  | 14.26283100 |
| H | 27.78357900 | 5.61399700  | 14.81244100 |
| H | 28.55654400 | 6.30922500  | 13.37635600 |
| H | 28.52010000 | 7.24068500  | 14.89688600 |
| C | 26.87374700 | 8.46900000  | 13.06447300 |
| H | 27.42152400 | 9.18392500  | 13.68707800 |
| H | 27.46460100 | 8.24819700  | 12.16779700 |
| H | 25.92357100 | 8.91650500  | 12.75984200 |
| C | 25.50076900 | 10.94658900 | 16.42866500 |
| C | 26.03920600 | 12.24924900 | 15.82048800 |
| H | 25.24839700 | 12.73751300 | 15.24077200 |
| H | 26.37387000 | 12.92783600 | 16.61336600 |
| H | 26.88080700 | 12.02995000 | 15.15418700 |
| C | 24.30389500 | 11.23331600 | 17.34544800 |
| H | 23.89807900 | 10.29238300 | 17.73069000 |
| H | 24.61599500 | 11.86593100 | 18.18480500 |
| H | 23.52408400 | 11.75693200 | 16.78062900 |
| C | 26.61437400 | 10.22184500 | 17.19698400 |
| H | 27.42562100 | 9.94928800  | 16.51343500 |
| H | 27.01250300 | 10.87602600 | 17.98124100 |
| H | 26.21997800 | 9.31794100  | 17.67355300 |

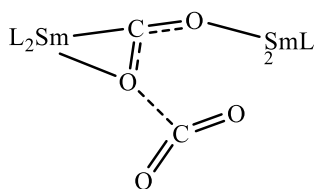

transition state

|    |             |            |             |
|----|-------------|------------|-------------|
| Sm | 26.86298800 | 4.06278300 | 17.38111900 |
| Sm | 22.21449700 | 1.91207000 | 14.50441800 |
| Si | 27.53074800 | 4.05396500 | 20.43721500 |
| Si | 19.75507000 | 1.73636300 | 16.45722300 |
| O  | 24.74852900 | 3.84227700 | 16.45714200 |
| O  | 24.42184700 | 1.76687400 | 15.63749200 |
| O  | 26.29034700 | 4.46236100 | 19.47931700 |
| O  | 28.61740300 | 5.23518500 | 20.87373600 |
| O  | 28.41512600 | 3.14172300 | 19.26567200 |
| O  | 27.15387200 | 3.20796000 | 21.81898900 |
| O  | 20.12563700 | 2.41502900 | 15.02832100 |
| O  | 18.27231900 | 0.98777000 | 16.56352500 |
| O  | 21.09615400 | 0.65168600 | 16.54938900 |
| O  | 19.91022700 | 2.66107200 | 17.82692100 |
| C  | 24.03048100 | 3.03801000 | 15.81760900 |
| C  | 28.40887300 | 6.30827400 | 21.83369800 |
| C  | 26.94821600 | 6.78026400 | 21.82296200 |
| H  | 26.65407600 | 7.07139000 | 20.80944800 |

|   |             |             |             |
|---|-------------|-------------|-------------|
| H | 26.83236800 | 7.63931200  | 22.49434100 |
| H | 26.28355900 | 5.97909500  | 22.16545100 |
| C | 29.33836800 | 7.44190300  | 21.38019500 |
| H | 30.37297200 | 7.08209100  | 21.35442100 |
| H | 29.27079200 | 8.28834600  | 22.07326500 |
| H | 29.05278200 | 7.77411000  | 20.37639200 |
| C | 28.81297100 | 5.80049600  | 23.22450900 |
| H | 28.17911700 | 4.95464600  | 23.50841400 |
| H | 28.70531100 | 6.60171400  | 23.96532000 |
| H | 29.85815500 | 5.47092800  | 23.20802400 |
| C | 29.72869900 | 2.50371600  | 19.42075100 |
| C | 30.77058900 | 3.43340600  | 18.79022200 |
| H | 30.54115100 | 3.59546200  | 17.73124400 |
| H | 31.76958400 | 2.98858700  | 18.86791200 |
| H | 30.76105100 | 4.39682000  | 19.30944500 |
| C | 30.05304800 | 2.26407500  | 20.90126500 |
| H | 30.10595800 | 3.21467400  | 21.44054900 |
| H | 31.02332000 | 1.75876500  | 20.97347100 |
| H | 29.28797300 | 1.63560100  | 21.36597100 |
| C | 29.65109000 | 1.16634500  | 18.67618700 |
| H | 28.89216000 | 0.52517700  | 19.13666700 |
| H | 30.62193900 | 0.65937300  | 18.71814000 |
| H | 29.38086500 | 1.32568400  | 17.62841800 |
| C | 26.00180900 | 2.34899300  | 22.04555500 |
| C | 26.28055600 | 1.66165700  | 23.38955100 |
| H | 27.19898400 | 1.06807500  | 23.32142400 |
| H | 25.44611300 | 1.00409600  | 23.65850400 |
| H | 26.40723800 | 2.41863000  | 24.17112500 |
| C | 25.87943200 | 1.30301500  | 20.92935700 |
| H | 25.66061100 | 1.79194000  | 19.97482700 |
| H | 25.06355600 | 0.60809000  | 21.15930400 |
| H | 26.81277600 | 0.73712300  | 20.83736400 |
| C | 24.73268500 | 3.20761800  | 22.13046100 |
| H | 24.83772600 | 3.94487200  | 22.93487000 |
| H | 23.86437600 | 2.57338000  | 22.34505600 |
| H | 24.57428700 | 3.73100600  | 21.18218500 |
| C | 17.48511100 | 0.37904000  | 15.50693500 |
| C | 16.35042800 | -0.35969700 | 16.23064400 |
| H | 15.68952600 | -0.84573600 | 15.50391900 |
| H | 15.76764300 | 0.35302700  | 16.82431500 |
| H | 16.76835200 | -1.11823500 | 16.90149500 |
| C | 16.91901100 | 1.47823500  | 14.59825000 |
| H | 16.31309400 | 2.17165300  | 15.19242900 |
| H | 16.28693100 | 1.03493100  | 13.81956600 |
| H | 17.73978000 | 2.03112600  | 14.13084800 |
| C | 18.33568300 | -0.61292300 | 14.70247700 |
| H | 18.77202200 | -1.36222800 | 15.37174000 |
| H | 19.14078200 | -0.08349200 | 14.18297900 |
| H | 17.71239700 | -1.11955900 | 13.95643700 |
| C | 21.52377900 | -0.12111000 | 17.72584600 |
| C | 20.29937900 | -0.64819300 | 18.48532500 |
| H | 19.70236800 | 0.18122500  | 18.87655500 |
| H | 20.63733100 | -1.26672500 | 19.32495800 |
| H | 19.67291500 | -1.25619000 | 17.82518800 |
| C | 22.35959600 | -1.28741300 | 17.18964900 |



|    |             |             |             |
|----|-------------|-------------|-------------|
| H  | 22.71110100 | -1.90474100 | 18.02430300 |
| H  | 23.23743200 | -0.91463500 | 16.64970600 |
| H  | 21.75253400 | -1.91012400 | 16.52349100 |
| C  | 22.37488800 | 0.78298100  | 18.62505400 |
| H  | 23.25222300 | 1.13588800  | 18.07395000 |
| H  | 22.71429600 | 0.21930300  | 19.50186400 |
| H  | 21.78553200 | 1.64548700  | 18.94660900 |
| C  | 19.02857100 | 3.71529800  | 18.30344600 |
| C  | 19.92830900 | 4.66429400  | 19.10636400 |
| H  | 20.41698900 | 4.11367200  | 19.91762800 |
| H  | 19.33236500 | 5.47834900  | 19.53474200 |
| H  | 20.69975800 | 5.08692400  | 18.45352800 |
| C  | 18.37642700 | 4.46244700  | 17.13158700 |
| H  | 19.14650000 | 4.85137300  | 16.45751500 |
| H  | 17.77812200 | 5.29773600  | 17.51406800 |
| H  | 17.71842800 | 3.79133700  | 16.56847000 |
| C  | 17.96467200 | 3.08016700  | 19.20902800 |
| H  | 17.30544800 | 3.85473400  | 19.61850300 |
| H  | 18.45193300 | 2.55535600  | 20.03878400 |
| H  | 17.37003700 | 2.36308100  | 18.63447000 |
| Si | 22.61498200 | 1.67771200  | 11.41814900 |
| Si | 28.02086700 | 6.08381700  | 15.27054600 |
| O  | 22.39317700 | 2.85234900  | 12.51100900 |
| O  | 24.11716000 | 1.48088000  | 10.73843400 |
| O  | 22.48089100 | 0.33999800  | 12.51899400 |
| O  | 21.52217700 | 1.60498700  | 10.16589900 |
| O  | 27.29634100 | 6.12875300  | 16.71954000 |
| O  | 27.07152500 | 6.17520700  | 13.90935900 |
| O  | 28.48032200 | 4.41667400  | 15.30685600 |
| O  | 29.28609500 | 7.13933800  | 15.03483400 |
| C  | 24.66982900 | 2.19663300  | 9.59710100  |
| C  | 24.22727400 | 3.66611100  | 9.61012600  |
| H  | 24.51061300 | 4.13569700  | 10.55782000 |
| H  | 24.70643000 | 4.20574900  | 8.78468900  |
| H  | 23.14086900 | 3.73807900  | 9.48982400  |
| C  | 26.19225900 | 2.09588100  | 9.75672300  |
| H  | 26.49033300 | 1.04192100  | 9.78814200  |
| H  | 26.69365200 | 2.58476000  | 8.91357900  |
| H  | 26.49963700 | 2.57985800  | 10.68904900 |
| C  | 24.21980900 | 1.49519000  | 8.30830100  |
| H  | 23.12908200 | 1.52406700  | 8.23033900  |
| H  | 24.66205700 | 1.99232200  | 7.43679200  |
| H  | 24.55009500 | 0.44999700  | 8.32348800  |
| C  | 22.82976800 | -1.06651200 | 12.26656700 |
| C  | 24.32371800 | -1.24870600 | 12.55524600 |
| H  | 24.55073000 | -0.98340400 | 13.59398400 |
| H  | 24.60890800 | -2.29482000 | 12.39227200 |
| H  | 24.90491800 | -0.60550600 | 11.88837100 |
| C  | 21.97663300 | -1.89339200 | 13.23338400 |
| H  | 20.91199000 | -1.73120300 | 13.03315300 |
| H  | 22.20409900 | -2.95856100 | 13.11280200 |
| H  | 22.19271900 | -1.61384400 | 14.27032600 |
| C  | 22.49672800 | -1.43944700 | 10.81715800 |
| H  | 23.10799700 | -0.85566700 | 10.12297000 |
| H  | 22.70590900 | -2.50454100 | 10.66387200 |

|   |             |             |             |
|---|-------------|-------------|-------------|
| H | 21.43979300 | -1.24819400 | 10.60765300 |
| C | 20.14949000 | 2.08393700  | 10.11850500 |
| C | 19.32939000 | 1.48407500  | 11.26675700 |
| H | 19.67162700 | 1.87398500  | 12.23094800 |
| H | 18.27310700 | 1.75218900  | 11.14802900 |
| H | 19.42041200 | 0.39226200  | 11.26106900 |
| C | 19.61009000 | 1.59171900  | 8.76780100  |
| H | 19.64205200 | 0.49717600  | 8.72992500  |
| H | 18.57616400 | 1.92688100  | 8.62837600  |
| H | 20.22846800 | 1.99150100  | 7.95668900  |
| C | 20.13144700 | 3.61731300  | 10.17948100 |
| H | 20.71559000 | 4.02935900  | 9.34865000  |
| H | 19.10037100 | 3.98123500  | 10.09903500 |
| H | 20.56270800 | 3.95838700  | 11.12582300 |
| C | 26.38982300 | 7.34275700  | 13.37361200 |
| C | 25.94100000 | 8.28631700  | 14.49805700 |
| H | 26.80951700 | 8.69456100  | 15.02632300 |
| H | 25.36815400 | 9.11924900  | 14.07349700 |
| H | 25.31379300 | 7.74671600  | 15.21480900 |
| C | 25.16917900 | 6.79103000  | 12.62540000 |
| H | 24.51633200 | 6.25373200  | 13.32184600 |
| H | 24.60657400 | 7.60911800  | 12.16118600 |
| H | 25.49538300 | 6.09471200  | 11.84506300 |
| C | 27.34448900 | 8.05644900  | 12.40647200 |
| H | 27.64931500 | 7.36538000  | 11.61228600 |
| H | 26.84628200 | 8.92114000  | 11.95206000 |
| H | 28.23542100 | 8.39178800  | 12.94684000 |
| C | 29.00109900 | 3.62329400  | 14.18643200 |
| C | 27.81704700 | 3.10935400  | 13.35959100 |
| H | 27.25460300 | 3.95569600  | 12.95597500 |
| H | 28.18122400 | 2.48071600  | 12.53905000 |
| H | 27.15300000 | 2.51012800  | 13.99096400 |
| C | 29.76880200 | 2.45295200  | 14.80999000 |
| H | 29.09539900 | 1.84957300  | 15.42784600 |
| H | 30.17938100 | 1.81422900  | 14.01972800 |
| H | 30.59261800 | 2.82694900  | 15.42760100 |
| C | 29.94070400 | 4.47683200  | 13.32534300 |
| H | 30.75028500 | 4.88622400  | 13.93752400 |
| H | 30.37018800 | 3.85198400  | 12.53349100 |
| H | 29.39241400 | 5.30401400  | 12.86423900 |
| C | 30.12183800 | 7.78235200  | 16.03503800 |
| C | 31.24416800 | 8.46074600  | 15.23760000 |
| H | 30.81213700 | 9.16985700  | 14.52307100 |
| H | 31.91758800 | 8.99848500  | 15.91486900 |
| H | 31.81586300 | 7.70742100  | 14.68434400 |
| C | 29.29205700 | 8.82504700  | 16.79621200 |
| H | 28.46475500 | 8.32947100  | 17.31476200 |
| H | 29.92135400 | 9.34499200  | 17.52827300 |
| H | 28.88696800 | 9.56220900  | 16.09342100 |
| C | 30.70332300 | 6.74366800  | 17.00072100 |
| H | 31.24091400 | 5.97072500  | 16.44069800 |
| H | 31.39843400 | 7.22781300  | 17.69656800 |
| H | 29.89936300 | 6.27933700  | 17.57980000 |
| O | 26.68894300 | 1.72772300  | 16.62575800 |
| O | 25.70815400 | -0.22553500 | 15.94614000 |

C 25.87527500 0.93042300 16.17181200

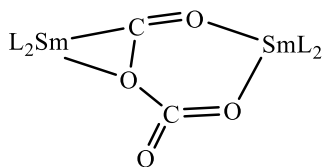

|    |             |            |             |
|----|-------------|------------|-------------|
| Sm | 26.90579800 | 4.04257900 | 17.38024800 |
| Sm | 22.19973600 | 1.94110000 | 14.49941400 |
| Si | 27.50728900 | 4.02737400 | 20.44476300 |
| Si | 19.75959900 | 1.76487600 | 16.46468300 |
| O  | 24.69908600 | 3.95243300 | 16.45264600 |
| O  | 24.43879000 | 1.83788300 | 15.61399900 |
| O  | 26.27463100 | 4.42122200 | 19.47158000 |
| O  | 28.55360600 | 5.22794400 | 20.92326800 |
| O  | 28.43777200 | 3.16554000 | 19.26923800 |
| O  | 27.13432600 | 3.14325200 | 21.80339100 |
| O  | 20.10928100 | 2.40934200 | 15.01232400 |
| O  | 18.29557800 | 0.98722000 | 16.59808200 |
| O  | 21.13063700 | 0.72031100 | 16.57744800 |
| O  | 19.90291100 | 2.73686600 | 17.80139600 |
| C  | 23.99756000 | 3.16728300 | 15.81613800 |
| C  | 28.29836600 | 6.27914000 | 21.89540100 |
| C  | 26.82405700 | 6.70694600 | 21.87112000 |
| H  | 26.53666600 | 7.01025800 | 20.85920400 |
| H  | 26.67195200 | 7.54794800 | 22.55791300 |
| H  | 26.17886400 | 5.87899400 | 22.18614000 |
| C  | 29.19862500 | 7.44777400 | 21.47253600 |
| H  | 30.24404800 | 7.12020100 | 21.45599400 |
| H  | 29.09535100 | 8.28086300 | 22.17732300 |
| H  | 28.91679900 | 7.78650000 | 20.46976700 |
| C  | 28.69858700 | 5.76269500 | 23.28423500 |
| H  | 28.08742300 | 4.89358800 | 23.54685400 |
| H  | 28.55633200 | 6.54893900 | 24.03519600 |
| H  | 29.75347900 | 5.46536100 | 23.27747700 |
| C  | 29.74807400 | 2.52130400 | 19.42921700 |
| C  | 30.79054400 | 3.43987000 | 18.78356100 |
| H  | 30.55837900 | 3.59009800 | 17.72345700 |
| H  | 31.78827000 | 2.99253900 | 18.86270300 |
| H  | 30.78740300 | 4.40967900 | 19.29114000 |
| C  | 30.07811700 | 2.30084300 | 20.91124900 |
| H  | 30.12568500 | 3.25838100 | 21.43874800 |
| H  | 31.05217700 | 1.80322600 | 20.98562200 |
| H  | 29.31970200 | 1.67224700 | 21.38643100 |
| C  | 29.66062100 | 1.17614700 | 18.69990800 |
| H  | 28.90491600 | 0.54143000 | 19.17397400 |
| H  | 30.63064600 | 0.66716000 | 18.73686800 |
| H  | 29.37874200 | 1.32402900 | 17.65323500 |
| C  | 26.01505200 | 2.23360700 | 21.99203900 |
| C  | 26.27236900 | 1.56903300 | 23.35180000 |
| H  | 27.22277300 | 1.02447100 | 23.32684200 |
| H  | 25.46297100 | 0.86971200 | 23.59042200 |
| H  | 26.32555100 | 2.33594200 | 24.13223200 |
| C  | 25.98944000 | 1.17645000 | 20.88022500 |
| H  | 25.80414600 | 1.64712100 | 19.90951400 |

|    |             |             |             |
|----|-------------|-------------|-------------|
| H  | 25.19062000 | 0.45104800  | 21.07340400 |
| H  | 26.94666900 | 0.64544800  | 20.84058500 |
| C  | 24.70361600 | 3.03028900  | 22.02176900 |
| H  | 24.74386000 | 3.77752300  | 22.82281800 |
| H  | 23.85985000 | 2.35615600  | 22.21142300 |
| H  | 24.55496000 | 3.53933300  | 21.06442600 |
| C  | 17.51687300 | 0.33283700  | 15.56146200 |
| C  | 16.40624300 | -0.41642900 | 16.31056500 |
| H  | 15.75182100 | -0.93366400 | 15.59968400 |
| H  | 15.81095300 | 0.29523800  | 16.89295300 |
| H  | 16.84730100 | -1.14983100 | 16.99431800 |
| C  | 16.91814200 | 1.39599200  | 14.63135800 |
| H  | 16.29761200 | 2.08752700  | 15.21249700 |
| H  | 16.29375600 | 0.91916400  | 13.86641600 |
| H  | 17.72235700 | 1.95815800  | 14.14654300 |
| C  | 18.38779800 | -0.65547700 | 14.77485600 |
| H  | 18.85097100 | -1.37463800 | 15.45885700 |
| H  | 19.17291400 | -0.11734500 | 14.23402800 |
| H  | 17.77275300 | -1.19849000 | 14.04783100 |
| C  | 21.57734400 | -0.02520800 | 17.76732100 |
| C  | 20.36389400 | -0.56765400 | 18.53335600 |
| H  | 19.74208100 | 0.25308100  | 18.90389800 |
| H  | 20.71558500 | -1.15727600 | 19.38795900 |
| H  | 19.75765800 | -1.20826500 | 17.88534300 |
| C  | 22.44101800 | -1.17974100 | 17.25121000 |
| H  | 22.79962900 | -1.77707000 | 18.09746500 |
| H  | 23.31661000 | -0.80207200 | 16.71022800 |
| H  | 21.84927500 | -1.82571600 | 16.59314200 |
| C  | 22.40198200 | 0.91518500  | 18.65354600 |
| H  | 23.27779000 | 1.27591400  | 18.10509400 |
| H  | 22.74756300 | 0.37643700  | 19.54327900 |
| H  | 21.79186900 | 1.77054000  | 18.95492400 |
| C  | 18.99314600 | 3.77796300  | 18.25608600 |
| C  | 19.86946200 | 4.77062200  | 19.03114700 |
| H  | 20.37581600 | 4.25428400  | 19.85404300 |
| H  | 19.25311000 | 5.57879700  | 19.44134300 |
| H  | 20.62702600 | 5.19757500  | 18.36499300 |
| C  | 18.31741100 | 4.47676700  | 17.06795800 |
| H  | 19.07458600 | 4.87617900  | 16.38533100 |
| H  | 17.69158400 | 5.30036700  | 17.43131400 |
| H  | 17.68193200 | 3.77221300  | 16.51992000 |
| C  | 17.95049600 | 3.13675000  | 19.18173500 |
| H  | 17.27427800 | 3.90391700  | 19.57720700 |
| H  | 18.45520100 | 2.64389100  | 20.02050700 |
| H  | 17.37049600 | 2.39203700  | 18.62767600 |
| Si | 22.59475000 | 1.72397300  | 11.42183100 |
| Si | 28.04707300 | 6.05344300  | 15.24393700 |
| O  | 22.35186500 | 2.89530500  | 12.51677300 |
| O  | 24.09755600 | 1.55948600  | 10.73953200 |
| O  | 22.49327700 | 0.39032100  | 12.53419200 |
| O  | 21.49732900 | 1.62458300  | 10.17721800 |
| O  | 27.31777800 | 6.11273200  | 16.68931700 |
| O  | 27.10269600 | 6.14272500  | 13.87815500 |
| O  | 28.49940000 | 4.38574400  | 15.29583700 |
| O  | 29.31769700 | 7.10223200  | 15.00195000 |

|   |             |             |             |
|---|-------------|-------------|-------------|
| C | 24.62853600 | 2.27196400  | 9.58476400  |
| C | 24.14230200 | 3.72749000  | 9.57264800  |
| H | 24.41386100 | 4.22278100  | 10.51062500 |
| H | 24.60398000 | 4.26602400  | 8.73662800  |
| H | 23.05411600 | 3.76532300  | 9.45282000  |
| C | 26.15304800 | 2.21929200  | 9.74559100  |
| H | 26.48271500 | 1.17549100  | 9.79380000  |
| H | 26.63953800 | 2.70953300  | 8.89457600  |
| H | 26.44638800 | 2.72648900  | 10.67015000 |
| C | 24.19798400 | 1.53437300  | 8.30984400  |
| H | 23.10678800 | 1.52961500  | 8.23293400  |
| H | 24.62424200 | 2.02864200  | 7.42885000  |
| H | 24.55929800 | 0.49996700  | 8.34301100  |
| C | 22.87356300 | -1.01319000 | 12.29405000 |
| C | 24.37605500 | -1.15727400 | 12.55645200 |
| H | 24.61956200 | -0.87801600 | 13.58802500 |
| H | 24.67971000 | -2.19893700 | 12.39750900 |
| H | 24.93032200 | -0.51013500 | 11.87077000 |
| C | 22.05889400 | -1.84495700 | 13.28910200 |
| H | 20.98657500 | -1.70595300 | 13.11348600 |
| H | 22.30415100 | -2.90664800 | 13.17366000 |
| H | 22.29706800 | -1.55291500 | 14.31799700 |
| C | 22.51882700 | -1.40804400 | 10.85602300 |
| H | 23.10504400 | -0.82047300 | 10.14349600 |
| H | 22.74589800 | -2.47031600 | 10.70938800 |
| H | 21.45435900 | -1.23952900 | 10.66553000 |
| C | 20.11086900 | 2.06494800  | 10.13648800 |
| C | 19.31330900 | 1.43713800  | 11.28543700 |
| H | 19.64676000 | 1.83424400  | 12.24978600 |
| H | 18.24911100 | 1.67388000  | 11.17115700 |
| H | 19.43701300 | 0.34857500  | 11.27551800 |
| C | 19.58117600 | 1.56232800  | 8.78587600  |
| H | 19.64474500 | 0.46935700  | 8.74337600  |
| H | 18.53743600 | 1.86777300  | 8.65162700  |
| H | 20.18454000 | 1.98317300  | 7.97414000  |
| C | 20.04953500 | 3.59682600  | 10.20295700 |
| H | 20.61960600 | 4.02806300  | 9.37220300  |
| H | 19.00819900 | 3.93120000  | 10.12610200 |
| H | 20.47279300 | 3.94773900  | 11.14927700 |
| C | 26.44208600 | 7.31514000  | 13.32822100 |
| C | 26.00471200 | 8.27831300  | 14.44066000 |
| H | 26.87812300 | 8.67856400  | 14.96674100 |
| H | 25.44602700 | 9.11539200  | 14.00542800 |
| H | 25.36745200 | 7.75659600  | 15.16185700 |
| C | 25.21471700 | 6.77609500  | 12.58150300 |
| H | 24.55046500 | 6.25741300  | 13.28131700 |
| H | 24.66741100 | 7.59850800  | 12.10673900 |
| H | 25.53224500 | 6.06624200  | 11.80982500 |
| C | 27.41065200 | 8.00291300  | 12.35609000 |
| H | 27.70657200 | 7.29810100  | 11.57067900 |
| H | 26.92763600 | 8.87045300  | 11.89079400 |
| H | 28.30509300 | 8.32957500  | 12.89581900 |
| C | 29.02160100 | 3.57106300  | 14.19155300 |
| C | 27.84471900 | 3.08974800  | 13.33521800 |
| H | 27.32055900 | 3.94969700  | 12.90957000 |

|   |             |             |             |
|---|-------------|-------------|-------------|
| H | 28.21165400 | 2.44254600  | 12.53041300 |
| H | 27.14766300 | 2.51649200  | 13.95465400 |
| C | 29.73065300 | 2.37742000  | 14.83956400 |
| H | 29.01576400 | 1.79507700  | 15.43109100 |
| H | 30.14821700 | 1.72682800  | 14.06275800 |
| H | 30.54443700 | 2.72478600  | 15.48551800 |
| C | 30.01003100 | 4.39290800  | 13.35531500 |
| H | 30.81661500 | 4.77610700  | 13.98833600 |
| H | 30.43956700 | 3.75495400  | 12.57402200 |
| H | 29.50136300 | 5.23791800  | 12.88090700 |
| C | 30.15474500 | 7.74862300  | 15.99838000 |
| C | 31.27686400 | 8.42317800  | 15.19733100 |
| H | 30.84457800 | 9.13069800  | 14.48134900 |
| H | 31.95188700 | 8.96221000  | 15.87198100 |
| H | 31.84673600 | 7.66746600  | 14.64549000 |
| C | 29.32755200 | 8.79468000  | 16.75790300 |
| H | 28.49975000 | 8.30164400  | 17.27800800 |
| H | 29.95846600 | 9.31494400  | 17.48832100 |
| H | 28.92330900 | 9.53108900  | 16.05382700 |
| C | 30.73648300 | 6.71270100  | 16.96683300 |
| H | 31.27201900 | 5.93704700  | 16.40863700 |
| H | 31.43287200 | 7.19806000  | 17.66056200 |
| H | 29.93210000 | 6.25149700  | 17.54781200 |
| O | 26.53917300 | 1.85687700  | 16.57674800 |
| O | 25.59523500 | -0.07263900 | 15.86516500 |
| C | 25.65608500 | 1.11776700  | 16.06805300 |

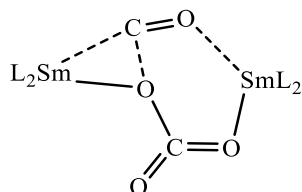

transition state

|    |             |            |             |
|----|-------------|------------|-------------|
| Sm | 26.92070500 | 4.13244700 | 17.45975500 |
| Sm | 22.29404100 | 1.85228800 | 14.49596000 |
| Si | 27.57451400 | 4.11401800 | 20.49166500 |
| Si | 19.80022900 | 1.71577600 | 16.41670200 |
| O  | 24.49634500 | 4.19829300 | 16.49476200 |
| O  | 24.31319300 | 1.90541400 | 15.61900700 |
| O  | 26.31671200 | 4.50614900 | 19.54623700 |
| O  | 28.59467400 | 5.32654500 | 20.98498500 |
| O  | 28.50387700 | 3.32341600 | 19.25766900 |
| O  | 27.25209200 | 3.15823700 | 21.81137800 |
| O  | 20.18384900 | 2.37257400 | 14.98350300 |
| O  | 18.30859700 | 0.98240400 | 16.52789400 |
| O  | 21.12988700 | 0.62012000 | 16.53286400 |
| O  | 19.95220000 | 2.65532000 | 17.77948300 |
| C  | 23.77441700 | 3.48952600 | 15.85650900 |
| C  | 28.33417000 | 6.34470700 | 21.99195200 |
| C  | 26.85547100 | 6.75672100 | 21.98685000 |
| H  | 26.55984900 | 7.08691500 | 20.98573700 |
| H  | 26.69759700 | 7.57563200 | 22.69845700 |
| H  | 26.21954200 | 5.91397100 | 22.28087200 |
| C  | 29.21967000 | 7.53463800 | 21.59916500 |
| H  | 30.26850500 | 7.21955200 | 21.56794500 |
| H  | 29.11061600 | 8.34498700 | 22.32901100 |

|   |             |             |             |
|---|-------------|-------------|-------------|
| H | 28.92883300 | 7.89983400  | 20.60832300 |
| C | 28.74817600 | 5.79031900  | 23.36163700 |
| H | 28.14835900 | 4.90715800  | 23.60247400 |
| H | 28.60242900 | 6.55208900  | 24.13667500 |
| H | 29.80582200 | 5.50420100  | 23.33990400 |
| C | 29.79996800 | 2.63272700  | 19.36305800 |
| C | 30.81463400 | 3.45745100  | 18.56605800 |
| H | 30.48974600 | 3.55992800  | 17.52487000 |
| H | 31.79265900 | 2.96252900  | 18.57874900 |
| H | 30.91027100 | 4.45354800  | 19.00931200 |
| C | 30.24156100 | 2.51673800  | 20.82678700 |
| H | 30.37034500 | 3.51109500  | 21.26482800 |
| H | 31.19745100 | 1.98152200  | 20.86584500 |
| H | 29.49936100 | 1.96625900  | 21.41161800 |
| C | 29.60496200 | 1.24242100  | 18.74847700 |
| H | 28.86733200 | 0.67775200  | 19.32737600 |
| H | 30.55498400 | 0.69595500  | 18.75010900 |
| H | 29.24566100 | 1.32247400  | 17.71761700 |
| C | 26.11747000 | 2.26695700  | 22.01721700 |
| C | 26.43035700 | 1.53026300  | 23.32680000 |
| H | 27.36047300 | 0.96072000  | 23.22188200 |
| H | 25.61458200 | 0.84269100  | 23.57689600 |
| H | 26.55004900 | 2.25542000  | 24.13901000 |
| C | 26.00008500 | 1.26806800  | 20.85950500 |
| H | 25.77281500 | 1.78984300  | 19.92461100 |
| H | 25.19173400 | 0.55645500  | 21.06329600 |
| H | 26.93677500 | 0.71297700  | 20.74105900 |
| C | 24.83380300 | 3.09569900  | 22.15768800 |
| H | 24.93689500 | 3.80078900  | 22.99064100 |
| H | 23.98279300 | 2.43467600  | 22.35974400 |
| H | 24.64627300 | 3.65336800  | 21.23468700 |
| C | 17.51531800 | 0.38302500  | 15.47104500 |
| C | 16.38406500 | -0.36144300 | 16.19425400 |
| H | 15.71824600 | -0.83985600 | 15.46689600 |
| H | 15.80570900 | 0.34608200  | 16.79846400 |
| H | 16.80558600 | -1.12681200 | 16.85504800 |
| C | 16.94555100 | 1.49071000  | 14.57480700 |
| H | 16.34272700 | 2.17932200  | 15.17770400 |
| H | 16.31005300 | 1.05500900  | 13.79460200 |
| H | 17.76549000 | 2.04621300  | 14.10876900 |
| C | 18.36059800 | -0.60078600 | 14.65185400 |
| H | 18.80149900 | -1.35616700 | 15.31126200 |
| H | 19.16178400 | -0.06413600 | 14.13405400 |
| H | 17.73281700 | -1.10021400 | 13.90459300 |
| C | 21.55721100 | -0.12881600 | 17.72439200 |
| C | 20.33078300 | -0.64058400 | 18.49106900 |
| H | 19.73026000 | 0.19704200  | 18.85881400 |
| H | 20.66560400 | -1.23788900 | 19.34723000 |
| H | 19.70875700 | -1.26562100 | 17.84248600 |
| C | 22.39563700 | -1.30497800 | 17.21385000 |
| H | 22.74173700 | -1.90622600 | 18.06264900 |
| H | 23.27702500 | -0.94220900 | 16.67279300 |
| H | 21.79166200 | -1.94093200 | 16.55737500 |
| C | 22.40883000 | 0.79293200  | 18.60553100 |
| H | 23.27667300 | 1.14445400  | 18.03871100 |

|    |             |             |             |
|----|-------------|-------------|-------------|
| H  | 22.75960100 | 0.24208800  | 19.48617400 |
| H  | 21.81485600 | 1.65435100  | 18.92167900 |
| C  | 19.06845800 | 3.71364200  | 18.23942600 |
| C  | 19.96110800 | 4.66589800  | 19.04691100 |
| H  | 20.44117200 | 4.11823600  | 19.86536700 |
| H  | 19.36184300 | 5.48254300  | 19.46573700 |
| H  | 20.73891700 | 5.08471900  | 18.39920300 |
| C  | 18.43093100 | 4.45647100  | 17.05658900 |
| H  | 19.20945000 | 4.83712900  | 16.38753800 |
| H  | 17.83228600 | 5.29664300  | 17.42786100 |
| H  | 17.77602800 | 3.78441500  | 16.49123600 |
| C  | 17.99262900 | 3.08800200  | 19.13796500 |
| H  | 17.33110400 | 3.86714500  | 19.53497600 |
| H  | 18.46965100 | 2.56734300  | 19.97629800 |
| H  | 17.40301000 | 2.36843400  | 18.56152600 |
| Si | 22.67561800 | 1.59454000  | 11.41100900 |
| Si | 27.98104500 | 6.13953800  | 15.30076800 |
| O  | 22.54942800 | 2.78967100  | 12.49333200 |
| O  | 24.15343200 | 1.26307800  | 10.72537600 |
| O  | 22.43822000 | 0.27527700  | 12.52028500 |
| O  | 21.57606100 | 1.59630600  | 10.16170400 |
| O  | 27.32153300 | 6.19042800  | 16.78458300 |
| O  | 26.97222800 | 6.25797400  | 13.98811000 |
| O  | 28.39970600 | 4.46016800  | 15.32102400 |
| O  | 29.26030300 | 7.16347100  | 15.02013000 |
| C  | 24.77422600 | 1.93852200  | 9.59674800  |
| C  | 24.52059100 | 3.45101600  | 9.66545200  |
| H  | 24.87116000 | 3.84755800  | 10.62410600 |
| H  | 25.05207100 | 3.95567400  | 8.84996000  |
| H  | 23.44998000 | 3.66267300  | 9.56740300  |
| C  | 26.27430700 | 1.64027500  | 9.72280100  |
| H  | 26.43732200 | 0.55684900  | 9.70918300  |
| H  | 26.82133600 | 2.09567100  | 8.88932100  |
| H  | 26.65444100 | 2.04304800  | 10.66674800 |
| C  | 24.22186500 | 1.34580300  | 8.29273900  |
| H  | 23.14262400 | 1.51368900  | 8.23605700  |
| H  | 24.71230800 | 1.81407000  | 7.43097500  |
| H  | 24.41643300 | 0.26742600  | 8.26686400  |
| C  | 22.72766300 | -1.15002300 | 12.29763500 |
| C  | 24.20943800 | -1.39057900 | 12.60708600 |
| H  | 24.44054400 | -1.10004800 | 13.63855100 |
| H  | 24.44788600 | -2.45341300 | 12.48118000 |
| H  | 24.82525600 | -0.79639000 | 11.92629300 |
| C  | 21.83046100 | -1.92097000 | 13.27034500 |
| H  | 20.77576800 | -1.72358800 | 13.05187100 |
| H  | 22.01950900 | -2.99636900 | 13.17668000 |
| H  | 22.04208700 | -1.62629900 | 14.30409700 |
| C  | 22.39169400 | -1.53379300 | 10.85182000 |
| H  | 23.03349800 | -0.98787600 | 10.15457700 |
| H  | 22.55672000 | -2.60932200 | 10.71801700 |
| H  | 21.34533600 | -1.30184700 | 10.63000500 |
| C  | 20.25773500 | 2.20854200  | 10.10469600 |
| C  | 19.36604500 | 1.67156000  | 11.23056500 |
| H  | 19.73511400 | 1.99748600  | 12.20852400 |
| H  | 18.34552500 | 2.05331600  | 11.10824300 |



|   |             |             |             |
|---|-------------|-------------|-------------|
| H | 19.34014200 | 0.57671500  | 11.19725300 |
| C | 19.69344100 | 1.79320900  | 8.73847100  |
| H | 19.62363500 | 0.70126300  | 8.68097200  |
| H | 18.69725900 | 2.22613000  | 8.59262800  |
| H | 20.35756500 | 2.14691700  | 7.94219100  |
| C | 20.38897900 | 3.73489800  | 10.19339700 |
| H | 21.02402600 | 4.10074800  | 9.37822600  |
| H | 19.40047200 | 4.20105800  | 10.10630600 |
| H | 20.83892900 | 4.01303900  | 11.15149900 |
| C | 26.30446300 | 7.44273100  | 13.46950800 |
| C | 25.87324900 | 8.37128400  | 14.61268400 |
| H | 26.74920600 | 8.75793200  | 15.14514500 |
| H | 25.30986000 | 9.21973600  | 14.20694700 |
| H | 25.24171100 | 7.82670200  | 15.32187000 |
| C | 25.07536000 | 6.91589400  | 12.71744600 |
| H | 24.41839300 | 6.37413200  | 13.40626900 |
| H | 24.52021700 | 7.74800000  | 12.26946800 |
| H | 25.39065600 | 6.22942200  | 11.92411400 |
| C | 27.26231800 | 8.15987300  | 12.50840400 |
| H | 27.55244700 | 7.47883400  | 11.70026200 |
| H | 26.77100100 | 9.03778200  | 12.07236900 |
| H | 28.16152700 | 8.47523400  | 13.04668100 |
| C | 28.80689100 | 3.63559200  | 14.17173100 |
| C | 27.55107600 | 3.20968600  | 13.40329300 |
| H | 27.03432200 | 4.09240500  | 13.01817800 |
| H | 27.82973600 | 2.55402400  | 12.57064100 |
| H | 26.87081300 | 2.66195100  | 14.06343400 |
| C | 29.51961600 | 2.41127500  | 14.75485700 |
| H | 28.83632500 | 1.85240300  | 15.40373400 |
| H | 29.84041000 | 1.74918000  | 13.94249400 |
| H | 30.40074500 | 2.72067600  | 15.32743800 |
| C | 29.75949600 | 4.43509200  | 13.27529400 |
| H | 30.62633900 | 4.77553300  | 13.85070000 |
| H | 30.10307000 | 3.79729700  | 12.45257000 |
| H | 29.24806900 | 5.30682000  | 12.85537800 |
| C | 30.13048600 | 7.81540800  | 15.98552100 |
| C | 31.23565600 | 8.46941500  | 15.14518400 |
| H | 30.79024700 | 9.17189400  | 14.43241300 |
| H | 31.93351400 | 9.01048800  | 15.79433100 |
| H | 31.78379100 | 7.70189100  | 14.58776900 |
| C | 29.33198500 | 8.87799400  | 16.75242700 |
| H | 28.51473500 | 8.39934100  | 17.30199500 |
| H | 29.98618900 | 9.40256700  | 17.45871000 |
| H | 28.91529200 | 9.60839800  | 16.04939700 |
| C | 30.72935200 | 6.78641400  | 16.95057200 |
| H | 31.24478600 | 6.00040600  | 16.38810800 |
| H | 31.44702000 | 7.27536400  | 17.61964800 |
| H | 29.93724300 | 6.33772600  | 17.55772700 |
| O | 26.48213700 | 1.87709700  | 16.71308700 |
| O | 25.62201200 | -0.08555400 | 15.94645900 |
| C | 25.68331500 | 1.08771000  | 16.17598600 |

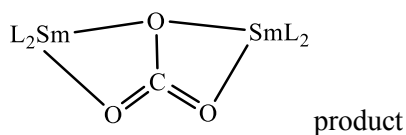

|    |             |             |             |
|----|-------------|-------------|-------------|
| Sm | 25.73403100 | 0.18235700  | 17.88641400 |
| Sm | 21.32117300 | 1.22907100  | 16.28678000 |
| Si | 26.98917200 | 0.44393200  | 20.72486100 |
| Si | 19.91236000 | 4.01455300  | 18.33480400 |
| O  | 23.89991700 | -1.40341000 | 18.02192300 |
| O  | 23.47168800 | 0.60822200  | 17.16908000 |
| O  | 21.79001100 | -0.83589900 | 17.40467700 |
| O  | 25.94505300 | 1.27228100  | 19.80306800 |
| O  | 28.57764500 | 0.93458600  | 20.74056400 |
| O  | 27.05142200 | -0.98629200 | 19.74861400 |
| O  | 26.54765300 | 0.16281200  | 22.30193000 |
| O  | 20.68063000 | 2.98111700  | 17.32245800 |
| O  | 20.96993700 | 5.12533000  | 19.00808200 |
| O  | 18.70595900 | 4.73266900  | 17.43405100 |
| O  | 19.15444300 | 3.25821400  | 19.62064100 |
| C  | 23.03171100 | -0.60882900 | 17.55647900 |
| C  | 29.13582900 | 2.08175700  | 21.44033500 |
| C  | 28.12725200 | 3.23804900  | 21.50015600 |
| H  | 27.79622100 | 3.50463900  | 20.49112600 |
| H  | 28.59515200 | 4.11187600  | 21.96883400 |
| H  | 27.25185100 | 2.95274600  | 22.09445200 |
| C  | 30.36925900 | 2.49271400  | 20.62502400 |
| H  | 31.06489900 | 1.64887500  | 20.55845900 |
| H  | 30.87603400 | 3.33756200  | 21.10527800 |
| H  | 30.06445800 | 2.78269900  | 19.61366500 |
| C  | 29.54435700 | 1.63744800  | 22.85136800 |
| H  | 28.66281200 | 1.29370000  | 23.40126200 |
| H  | 30.00748400 | 2.47226900  | 23.39070500 |
| H  | 30.26565100 | 0.81495400  | 22.78473900 |
| C  | 27.83660900 | -2.21086800 | 19.95908200 |
| C  | 28.97728100 | -2.19782000 | 18.93676000 |
| H  | 28.57380800 | -2.15154200 | 17.91917100 |
| H  | 29.58054200 | -3.10807800 | 19.03229900 |
| H  | 29.61241000 | -1.32314000 | 19.10884300 |
| C  | 28.40063500 | -2.26874300 | 21.38408400 |
| H  | 29.07092100 | -1.42269700 | 21.56258600 |
| H  | 28.96328900 | -3.20195800 | 21.50398900 |
| H  | 27.59290400 | -2.24080600 | 22.12038600 |
| C  | 26.88113400 | -3.38457000 | 19.71742500 |
| H  | 26.06219100 | -3.35483400 | 20.44318100 |
| H  | 27.41930300 | -4.33364900 | 19.82201200 |
| H  | 26.45444900 | -3.33296900 | 18.71082600 |
| C  | 25.20409000 | 0.08562200  | 22.85842500 |
| C  | 25.40365300 | -0.40396300 | 24.29959300 |
| H  | 25.88102100 | -1.39018500 | 24.29558900 |
| H  | 24.43768800 | -0.47511900 | 24.81203700 |
| H  | 26.04687600 | 0.29743800  | 24.84209800 |
| C  | 24.34597500 | -0.91334900 | 22.07176900 |
| H  | 24.19358200 | -0.57010600 | 21.04368500 |
| H  | 23.36511700 | -1.01737500 | 22.55016600 |
| H  | 24.83161300 | -1.89501200 | 22.05018600 |
| C  | 24.57152100 | 1.48314900  | 22.84745800 |
| H  | 25.20007400 | 2.17813000  | 23.41616700 |
| H  | 23.57814900 | 1.44851300  | 23.31025800 |
| H  | 24.47923000 | 1.84220600  | 21.81774700 |

|    |             |             |             |
|----|-------------|-------------|-------------|
| C  | 22.01983200 | 5.86214100  | 18.33272500 |
| C  | 22.20852700 | 7.14656700  | 19.15382300 |
| H  | 23.01743800 | 7.75437100  | 18.73227900 |
| H  | 22.45556300 | 6.88797300  | 20.18939500 |
| H  | 21.28025300 | 7.72834100  | 19.14809100 |
| C  | 23.30468700 | 5.02156400  | 18.35958600 |
| H  | 23.56464900 | 4.77013900  | 19.39383300 |
| H  | 24.13532700 | 5.57666700  | 17.90801000 |
| H  | 23.15080200 | 4.09334600  | 17.80033600 |
| C  | 21.63311300 | 6.21051600  | 16.88677500 |
| H  | 20.69388100 | 6.77245600  | 16.87023500 |
| H  | 21.50376900 | 5.29672000  | 16.29657900 |
| H  | 22.42434600 | 6.81712300  | 16.43049900 |
| C  | 17.54648300 | 5.46360900  | 17.89788500 |
| C  | 17.86135900 | 6.30765900  | 19.14241500 |
| H  | 18.13622900 | 5.65927900  | 19.97950600 |
| H  | 16.97916900 | 6.89618200  | 19.42136900 |
| H  | 18.69418100 | 6.98691300  | 18.93377000 |
| C  | 17.14747200 | 6.37940000  | 16.73076300 |
| H  | 16.24167700 | 6.94392900  | 16.98052200 |
| H  | 16.96017100 | 5.77404400  | 15.83761400 |
| H  | 17.96129300 | 7.08117000  | 16.51619900 |
| C  | 16.42661500 | 4.45497300  | 18.19423400 |
| H  | 16.21459500 | 3.87036500  | 17.29174500 |
| H  | 15.51324200 | 4.97692100  | 18.50433900 |
| H  | 16.75012100 | 3.77759600  | 18.99043100 |
| C  | 19.73753300 | 2.76034100  | 20.84890600 |
| C  | 18.71930900 | 1.75286100  | 21.40254200 |
| H  | 17.75603700 | 2.25100400  | 21.55843100 |
| H  | 19.06991700 | 1.34214200  | 22.35638400 |
| H  | 18.58184800 | 0.93396300  | 20.68754500 |
| C  | 21.08057200 | 2.06334400  | 20.58746900 |
| H  | 20.94265900 | 1.22527700  | 19.89471700 |
| H  | 21.48485100 | 1.67226200  | 21.52786600 |
| H  | 21.80072900 | 2.77010000  | 20.16240300 |
| C  | 19.91829400 | 3.92970500  | 21.82861600 |
| H  | 20.32059600 | 3.56617500  | 22.78185600 |
| H  | 18.94899100 | 4.40702000  | 22.01255500 |
| H  | 20.60282200 | 4.66620100  | 21.39796400 |
| Si | 19.99134400 | 0.61064500  | 13.56829300 |
| Si | 27.04131500 | 0.76201800  | 15.08449300 |
| O  | 21.26876400 | 1.47662700  | 14.07870700 |
| O  | 20.26014100 | -0.85795900 | 12.84665500 |
| O  | 19.41472300 | 0.18215100  | 15.15190300 |
| O  | 18.86208600 | 1.39796200  | 12.64237100 |
| O  | 26.77957700 | 1.54618000  | 16.47831000 |
| O  | 26.01502800 | 1.03393700  | 13.80486900 |
| O  | 26.59285600 | -0.82060500 | 15.63287600 |
| O  | 28.58732600 | 0.83945200  | 14.47393500 |
| C  | 20.51657600 | -1.14203500 | 11.44317300 |
| C  | 21.33480700 | -0.01764700 | 10.79413500 |
| H  | 22.26932000 | 0.13401400  | 11.34394000 |
| H  | 21.56969100 | -0.28214000 | 9.75639200  |
| H  | 20.76304500 | 0.91646000  | 10.79573300 |
| C  | 21.31345300 | -2.45362300 | 11.43737000 |

|   |             |             |             |
|---|-------------|-------------|-------------|
| H | 20.73435800 | -3.24074700 | 11.93258200 |
| H | 21.52937000 | -2.76102200 | 10.40772900 |
| H | 22.25579700 | -2.31521200 | 11.97824600 |
| C | 19.17021700 | -1.32226300 | 10.72962100 |
| H | 18.59565100 | -0.39260800 | 10.78591500 |
| H | 19.33339400 | -1.58626800 | 9.67799700  |
| H | 18.60167100 | -2.12565900 | 11.21191700 |
| C | 18.40053600 | -0.80060400 | 15.56341900 |
| C | 19.03249100 | -2.19641600 | 15.53522300 |
| H | 19.90587500 | -2.22415000 | 16.19621700 |
| H | 18.30178700 | -2.93784000 | 15.87974100 |
| H | 19.34777600 | -2.43977800 | 14.51694000 |
| C | 18.00855700 | -0.40763300 | 16.99291200 |
| H | 17.64068100 | 0.62397300  | 17.01875100 |
| H | 17.22182400 | -1.07582000 | 17.36055800 |
| H | 18.87059400 | -0.50483600 | 17.66577700 |
| C | 17.19597500 | -0.70869900 | 14.62246700 |
| H | 17.49268800 | -0.96364400 | 13.60033200 |
| H | 16.42273500 | -1.41199200 | 14.95251300 |
| H | 16.78394600 | 0.30503000  | 14.63031600 |
| C | 18.51621600 | 2.81442500  | 12.63779200 |
| C | 18.13723800 | 3.28259300  | 14.04649900 |
| H | 18.99739400 | 3.26439200  | 14.72288300 |
| H | 17.76952300 | 4.31411200  | 14.00874700 |
| H | 17.34787400 | 2.64331100  | 14.45614800 |
| C | 17.30615700 | 2.91553700  | 11.69879200 |
| H | 16.47994500 | 2.31144800  | 12.08954800 |
| H | 16.98048700 | 3.95827100  | 11.61376400 |
| H | 17.57760900 | 2.54288500  | 10.70489400 |
| C | 19.69594900 | 3.62603800  | 12.08669700 |
| H | 19.93967700 | 3.28743600  | 11.07318600 |
| H | 19.43273000 | 4.68961900  | 12.05031900 |
| H | 20.57110400 | 3.49036100  | 12.72944300 |
| C | 25.97038300 | 2.20135400  | 12.93528900 |
| C | 26.10942900 | 3.48938600  | 13.75857400 |
| H | 27.09078100 | 3.53405500  | 14.24413500 |
| H | 26.00221600 | 4.36183300  | 13.10340600 |
| H | 25.33580000 | 3.52500600  | 14.53258100 |
| C | 24.59591600 | 2.14689100  | 12.25723900 |
| H | 23.79640100 | 2.16456200  | 13.00500800 |
| H | 24.47536100 | 3.00060300  | 11.58045500 |
| H | 24.50817900 | 1.22063100  | 11.67819400 |
| C | 27.08513600 | 2.09366900  | 11.88550000 |
| H | 26.96508200 | 1.16452800  | 11.31667800 |
| H | 27.02853400 | 2.94219200  | 11.19327400 |
| H | 28.06356900 | 2.08349500  | 12.37357500 |
| C | 26.30564200 | -1.99708100 | 14.79933900 |
| C | 24.86324000 | -1.89768900 | 14.28744000 |
| H | 24.74338400 | -0.98924500 | 13.69141400 |
| H | 24.62700800 | -2.77547400 | 13.67415200 |
| H | 24.16765000 | -1.86930800 | 15.13377000 |
| C | 26.46074800 | -3.21749900 | 15.71202800 |
| H | 25.73744500 | -3.16563300 | 16.53413100 |
| H | 26.26644300 | -4.13322900 | 15.14211300 |
| H | 27.47718700 | -3.26318200 | 16.11779500 |

|   |             |             |             |
|---|-------------|-------------|-------------|
| C | 27.30360600 | -2.06468000 | 13.63724600 |
| H | 28.32926700 | -2.08893800 | 14.01898100 |
| H | 27.11701200 | -2.97203400 | 13.05117800 |
| H | 27.18886700 | -1.19282400 | 12.98596200 |
| C | 29.82163800 | 1.18991800  | 15.15561600 |
| C | 30.92658000 | 0.96746500  | 14.11327500 |
| H | 30.73854300 | 1.59688900  | 13.23663700 |
| H | 31.90372200 | 1.22563100  | 14.53711300 |
| H | 30.93610500 | -0.08176000 | 13.79829200 |
| C | 29.77576400 | 2.66245700  | 15.58599200 |
| H | 28.95786000 | 2.81584300  | 16.29724300 |
| H | 30.72488500 | 2.94448500  | 16.05722900 |
| H | 29.61622400 | 3.30041200  | 14.70886700 |
| C | 30.04101100 | 0.27586100  | 16.36623400 |
| H | 30.01011500 | -0.77317300 | 16.05215600 |
| H | 31.01659300 | 0.48294800  | 16.82138400 |
| H | 29.26511800 | 0.45242000  | 17.11751100 |

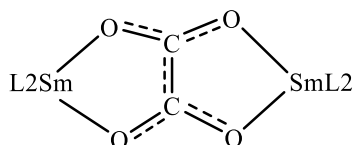

|    |             |             |             |
|----|-------------|-------------|-------------|
| Sm | 24.91323100 | 7.93350300  | 17.31212800 |
| Sm | 21.24903600 | 2.91382700  | 16.86135300 |
| Si | 25.59669500 | 9.44375000  | 20.63652900 |
| Si | 19.68132300 | 1.80599700  | 20.09170400 |
| O  | 24.83853800 | 5.51346100  | 17.32878900 |
| O  | 24.99919400 | 8.80295900  | 19.25124700 |
| O  | 25.74931300 | 11.10525600 | 20.61728600 |
| O  | 27.14314000 | 8.82524600  | 20.77011900 |
| O  | 24.63081100 | 9.08915700  | 21.95728000 |
| O  | 20.37135800 | 2.25565700  | 18.67395800 |
| O  | 19.04159300 | 3.12793200  | 20.89792500 |
| O  | 18.52379000 | 0.66250800  | 19.72604200 |
| O  | 20.77981100 | 1.11570700  | 21.14362200 |
| C  | 23.72817700 | 4.94045000  | 17.18794800 |
| C  | 24.70033200 | 12.10146100 | 20.72025200 |
| C  | 23.42756200 | 11.65472800 | 19.98538800 |
| H  | 23.65787300 | 11.43342000 | 18.93787100 |
| H  | 22.67833000 | 12.45413100 | 20.02445400 |
| H  | 23.01046100 | 10.75743100 | 20.45424900 |
| C  | 25.27365300 | 13.36512500 | 20.06295100 |
| H  | 26.19920900 | 13.65603800 | 20.57205100 |
| H  | 24.55313900 | 14.18832200 | 20.13041200 |
| H  | 25.49547900 | 13.16628900 | 19.00877800 |
| C  | 24.40827700 | 12.35725300 | 22.20611600 |
| H  | 24.04849400 | 11.43560300 | 22.67299200 |
| H  | 23.65140400 | 13.14337000 | 22.31439800 |
| H  | 25.32704600 | 12.67804700 | 22.71056500 |
| C  | 28.21109900 | 9.25661500  | 21.64860500 |
| C  | 28.95162800 | 10.42238000 | 20.97730000 |
| H  | 29.33222000 | 10.10120600 | 20.00105200 |
| H  | 29.79433600 | 10.74774400 | 21.59914100 |
| H  | 28.25855200 | 11.25622000 | 20.83175800 |
| C  | 27.68007500 | 9.67732900  | 23.02768700 |

|   |             |             |             |
|---|-------------|-------------|-------------|
| H | 27.01943500 | 10.54462600 | 22.93165900 |
| H | 28.52072800 | 9.94111500  | 23.68035900 |
| H | 27.11800500 | 8.85584100  | 23.48315200 |
| C | 29.13953200 | 8.04111500  | 21.78792100 |
| H | 28.59224000 | 7.20655900  | 22.24008100 |
| H | 30.00212700 | 8.28923300  | 22.41717000 |
| H | 29.49443600 | 7.73356400  | 20.79802200 |
| C | 23.99645400 | 7.82916100  | 22.28406200 |
| C | 23.75215200 | 7.87749000  | 23.79986600 |
| H | 24.70943000 | 7.96427100  | 24.32547900 |
| H | 23.23836000 | 6.96835000  | 24.13281300 |
| H | 23.13537300 | 8.74886100  | 24.04547900 |
| C | 24.89724500 | 6.63431900  | 21.93470100 |
| H | 25.07031500 | 6.58990800  | 20.85422900 |
| H | 24.41444600 | 5.70221800  | 22.25063000 |
| H | 25.86363800 | 6.72827000  | 22.43995900 |
| C | 22.65990300 | 7.73812600  | 21.53324100 |
| H | 22.03094300 | 8.59666600  | 21.79432200 |
| H | 22.13200500 | 6.81538700  | 21.80177600 |
| H | 22.83996700 | 7.74939300  | 20.45367000 |
| C | 17.91097100 | 3.95846800  | 20.53961800 |
| C | 18.10364100 | 5.26556600  | 21.32259200 |
| H | 17.26743900 | 5.94898400  | 21.13625600 |
| H | 19.03695700 | 5.74888600  | 21.01288200 |
| H | 18.15622200 | 5.04659000  | 22.39474000 |
| C | 17.86581600 | 4.25113100  | 19.03181900 |
| H | 18.79114200 | 4.74426200  | 18.71520700 |
| H | 17.02281600 | 4.91722200  | 18.81417200 |
| H | 17.73508300 | 3.32374900  | 18.46267900 |
| C | 16.61842600 | 3.25763800  | 20.98328700 |
| H | 16.66557300 | 3.04644800  | 22.05736500 |
| H | 16.50522900 | 2.31493400  | 20.43900800 |
| H | 15.75172500 | 3.89844600  | 20.78254200 |
| C | 18.16296800 | -0.55823500 | 20.41695700 |
| C | 17.94378200 | -0.30865600 | 21.91648500 |
| H | 18.87224200 | 0.04566500  | 22.37328000 |
| H | 17.63558000 | -1.24062200 | 22.40550200 |
| H | 17.16079200 | 0.44258200  | 22.06235000 |
| C | 16.85359900 | -1.01916300 | 19.75963600 |
| H | 16.51167500 | -1.95812200 | 20.20998700 |
| H | 17.01420200 | -1.17103500 | 18.68689900 |
| H | 16.08169800 | -0.25342000 | 19.89534700 |
| C | 19.26761800 | -1.60204300 | 20.19428500 |
| H | 19.41726700 | -1.75042500 | 19.11894100 |
| H | 18.98330800 | -2.55800000 | 20.65059500 |
| H | 20.20157900 | -1.24876300 | 20.64162300 |
| C | 21.75663100 | 1.77892700  | 21.98393700 |
| C | 22.85782900 | 0.73736600  | 22.22956400 |
| H | 22.42374700 | -0.15528400 | 22.69313900 |
| H | 23.62840500 | 1.14722300  | 22.89252300 |
| H | 23.31734000 | 0.45254700  | 21.27649000 |
| C | 22.34715300 | 3.01985000  | 21.29632500 |
| H | 22.80931500 | 2.73998700  | 20.34343000 |
| H | 23.11361800 | 3.46735300  | 21.94003500 |
| H | 21.56144300 | 3.76054500  | 21.11285700 |

|    |             |             |             |
|----|-------------|-------------|-------------|
| C  | 21.08022700 | 2.16765700  | 23.30697700 |
| H  | 21.80873000 | 2.62638300  | 23.98610800 |
| H  | 20.66605700 | 1.27213700  | 23.78388600 |
| H  | 20.26828200 | 2.87360300  | 23.10874700 |
| Si | 20.86404500 | 1.30696200  | 14.24933300 |
| Si | 26.48606600 | 9.10419700  | 14.92629800 |
| O  | 20.08010000 | 2.50079500  | 15.01942900 |
| O  | 21.80359700 | 1.69093400  | 12.93683900 |
| O  | 22.04122200 | 1.01470600  | 15.49758800 |
| O  | 19.98602600 | -0.03963200 | 13.84224400 |
| O  | 25.07221500 | 9.41038200  | 15.66308400 |
| O  | 26.46958400 | 8.26671600  | 13.49451800 |
| O  | 27.03615700 | 7.91163000  | 16.06973200 |
| O  | 27.53659200 | 10.37253800 | 14.73756600 |
| C  | 21.35483200 | 1.94410500  | 11.57472400 |
| C  | 19.98125500 | 2.62993800  | 11.56809400 |
| H  | 20.01484500 | 3.55139600  | 12.15889000 |
| H  | 19.69477100 | 2.87471800  | 10.53859500 |
| H  | 19.21991100 | 1.96524400  | 11.99146600 |
| C  | 22.41682500 | 2.86907600  | 10.96564900 |
| H  | 23.39865900 | 2.38508000  | 11.01036400 |
| H  | 22.17314000 | 3.08793700  | 9.91982500  |
| H  | 22.45880400 | 3.80784600  | 11.52883400 |
| C  | 21.30575900 | 0.60705100  | 10.82388900 |
| H  | 20.58018200 | -0.05952600 | 11.30016000 |
| H  | 21.01729200 | 0.77220500  | 9.77902700  |
| H  | 22.29418200 | 0.13431300  | 10.84840700 |
| C  | 23.25372700 | 0.18313400  | 15.47125900 |
| C  | 24.38043100 | 0.99297000  | 14.82007100 |
| H  | 24.56178500 | 1.90846600  | 15.39418200 |
| H  | 25.30192800 | 0.39921000  | 14.80386500 |
| H  | 24.09840200 | 1.25890500  | 13.79751200 |
| C  | 23.57554300 | -0.12259500 | 16.93894400 |
| H  | 22.72884300 | -0.62841600 | 17.41580200 |
| H  | 24.45853600 | -0.76837100 | 17.00124000 |
| H  | 23.79764100 | 0.80418600  | 17.48313700 |
| C  | 22.97354800 | -1.10612800 | 14.69356500 |
| H  | 22.72412800 | -0.87573000 | 13.65301800 |
| H  | 23.86669000 | -1.74120800 | 14.71147800 |
| H  | 22.13882100 | -1.65014100 | 15.14579600 |
| C  | 18.77975400 | -0.56178600 | 14.47301600 |
| C  | 19.02033200 | -0.81513800 | 15.96609400 |
| H  | 19.18541900 | 0.12266900  | 16.50625600 |
| H  | 18.14258400 | -1.30313300 | 16.40496700 |
| H  | 19.89007300 | -1.46751700 | 16.10090500 |
| C  | 18.50173400 | -1.88587700 | 13.74785000 |
| H  | 19.34456200 | -2.57194100 | 13.88590000 |
| H  | 17.59178100 | -2.34884600 | 14.14575100 |
| H  | 18.36933100 | -1.69938800 | 12.67649600 |
| C  | 17.62100500 | 0.42135600  | 14.26204100 |
| H  | 17.46076200 | 0.58195100  | 13.18971900 |
| H  | 16.70172400 | 0.01366100  | 14.69834800 |
| H  | 17.85352200 | 1.37959700  | 14.73674400 |
| C  | 26.16291300 | 8.78621800  | 12.16919900 |
| C  | 25.11997600 | 9.90966300  | 12.24744700 |

|   |             |             |             |
|---|-------------|-------------|-------------|
| H | 25.52554700 | 10.77190400 | 12.78840600 |
| H | 24.84589200 | 10.23198900 | 11.23619600 |
| H | 24.22280100 | 9.55567800  | 12.76629600 |
| C | 25.60154200 | 7.59068500  | 11.38783800 |
| H | 24.68328100 | 7.23277400  | 11.86638800 |
| H | 25.37788000 | 7.88386200  | 10.35575800 |
| H | 26.33590200 | 6.77781700  | 11.37776900 |
| C | 27.46688300 | 9.28577800  | 11.53387900 |
| H | 28.19354400 | 8.46656900  | 11.49113500 |
| H | 27.27691700 | 9.64545300  | 10.51577600 |
| H | 27.88317100 | 10.09998600 | 12.13513300 |
| C | 28.20431500 | 7.01844300  | 16.02615800 |
| C | 27.87863500 | 5.83438000  | 15.10916000 |
| H | 27.66037500 | 6.19462000  | 14.10028900 |
| H | 28.73172400 | 5.14659400  | 15.07837100 |
| H | 27.00638800 | 5.29553100  | 15.49565400 |
| C | 28.41676200 | 6.54747200  | 17.46989400 |
| H | 27.55956100 | 5.95187500  | 17.80930900 |
| H | 29.30777500 | 5.91204800  | 17.52595000 |
| H | 28.54904700 | 7.40536900  | 18.13841100 |
| C | 29.42185200 | 7.79861500  | 15.52114300 |
| H | 29.61558500 | 8.66009800  | 16.16750300 |
| H | 30.30006500 | 7.14285600  | 15.52764600 |
| H | 29.25297600 | 8.15407900  | 14.49977600 |
| C | 27.63683400 | 11.59351200 | 15.52882100 |
| C | 28.90936800 | 12.28439900 | 15.02048900 |
| H | 28.81955700 | 12.47984400 | 13.94632600 |
| H | 29.05902500 | 13.23430300 | 15.54593600 |
| H | 29.77787900 | 11.63894100 | 15.19098800 |
| C | 26.40514200 | 12.46985500 | 15.26640800 |
| H | 25.49960700 | 11.94480100 | 15.58676100 |
| H | 26.49218000 | 13.41266000 | 15.81936900 |
| H | 26.33078600 | 12.69499600 | 14.19632000 |
| C | 27.76720700 | 11.26519900 | 17.02027500 |
| H | 28.60683000 | 10.58211700 | 17.18645400 |
| H | 27.94454700 | 12.18373000 | 17.59084800 |
| H | 26.84973900 | 10.80595300 | 17.40198900 |
| O | 21.36547900 | 5.29796800  | 16.90320000 |
| O | 22.69262000 | 7.10768800  | 17.05262900 |
| C | 22.47712900 | 5.86966900  | 17.03352200 |
| O | 23.51522900 | 3.70136300  | 17.15423900 |

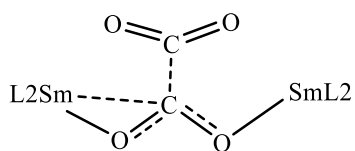

transition state

|    |             |            |             |
|----|-------------|------------|-------------|
| Sm | 24.87129500 | 6.61684500 | 16.97352500 |
| Sm | 21.08687500 | 2.75103100 | 14.16285500 |
| Si | 24.81419300 | 6.93018400 | 20.07350800 |
| Si | 18.72348900 | 1.98483200 | 16.05327300 |
| O  | 24.62176500 | 4.16124300 | 16.51264000 |
| O  | 23.17719200 | 2.70700400 | 15.50401600 |
| O  | 23.81041900 | 7.16199800 | 18.81857100 |
| O  | 25.69706800 | 8.22749800 | 20.62198700 |
| O  | 26.00026400 | 6.00794400 | 19.21791600 |



|   |             |             |             |
|---|-------------|-------------|-------------|
| O | 24.18637600 | 6.16283200  | 21.40312800 |
| O | 19.18118600 | 3.24467800  | 15.15491700 |
| O | 17.19314900 | 1.39030600  | 15.80455600 |
| O | 19.97282400 | 0.88865600  | 15.54089400 |
| O | 18.93744000 | 2.07168300  | 17.70365800 |
| C | 23.65348600 | 3.81794600  | 15.81147800 |
| C | 25.21210000 | 9.33697100  | 21.43139500 |
| C | 23.75505600 | 9.67354300  | 21.09035900 |
| H | 23.65649100 | 9.88304200  | 20.02529200 |
| H | 23.43787300 | 10.55421200 | 21.66628200 |
| H | 23.09632200 | 8.83652100  | 21.34760700 |
| C | 26.13087300 | 10.51650900 | 21.08689800 |
| H | 27.17119000 | 10.25393400 | 21.30261200 |
| H | 25.85150500 | 11.39615800 | 21.68043600 |
| H | 26.03491200 | 10.76159600 | 20.02228200 |
| C | 25.35476700 | 8.95498700  | 22.91121800 |
| H | 24.73801800 | 8.07619300  | 23.12988200 |
| H | 25.04499700 | 9.79148400  | 23.54892600 |
| H | 26.40561900 | 8.71084800  | 23.12954300 |
| C | 27.23914900 | 5.40351200  | 19.72667000 |
| C | 28.40438000 | 6.25621400  | 19.21614600 |
| H | 28.37559900 | 6.31868800  | 18.12341800 |
| H | 29.35869700 | 5.81579000  | 19.52583400 |
| H | 28.32240800 | 7.26622600  | 19.63025600 |
| C | 27.24200400 | 5.36143500  | 21.26044100 |
| H | 27.18380900 | 6.37481900  | 21.66921800 |
| H | 28.18187300 | 4.89648600  | 21.59486000 |
| H | 26.40262600 | 4.77855400  | 21.63803700 |
| C | 27.29275500 | 3.98178800  | 19.15783600 |
| H | 26.43819900 | 3.40436800  | 19.51312200 |
| H | 28.22117100 | 3.48525500  | 19.47742200 |
| H | 27.27159300 | 4.00437900  | 18.06436300 |
| C | 23.04776100 | 5.25592000  | 21.44224600 |
| C | 23.03183000 | 4.70357200  | 22.87731900 |
| H | 23.96811900 | 4.16414400  | 23.07443600 |
| H | 22.18846500 | 4.01858900  | 23.00960200 |
| H | 22.94052100 | 5.52770800  | 23.58932700 |
| C | 23.23179200 | 4.11278200  | 20.43369000 |
| H | 23.24495100 | 4.50885300  | 19.41318600 |
| H | 22.40301400 | 3.40147700  | 20.51926400 |
| H | 24.17311800 | 3.58854700  | 20.62765300 |
| C | 21.75737200 | 6.03719500  | 21.15739500 |
| H | 21.64856500 | 6.85222300  | 21.88918700 |
| H | 20.89106200 | 5.37784400  | 21.24210200 |
| H | 21.79634400 | 6.46495600  | 20.15038100 |
| C | 16.33406500 | 1.58176500  | 14.64513200 |
| C | 15.11507600 | 0.68363600  | 14.91092400 |
| H | 14.39228300 | 0.77744300  | 14.09596600 |
| H | 14.63829400 | 0.97668600  | 15.85021500 |
| H | 15.43222900 | -0.36410300 | 14.99221500 |
| C | 15.91108700 | 3.05170100  | 14.56298300 |
| H | 15.40154500 | 3.34407500  | 15.49533400 |
| H | 15.21742900 | 3.20043200  | 13.72535700 |
| H | 16.79138600 | 3.68483700  | 14.42166100 |
| C | 17.03907100 | 1.14528400  | 13.35647800 |

|    |             |             |             |
|----|-------------|-------------|-------------|
| H  | 17.37622200 | 0.10482900  | 13.44816700 |
| H  | 17.90123300 | 1.78657200  | 13.15177700 |
| H  | 16.34626000 | 1.21630200  | 12.51354400 |
| C  | 20.34817000 | -0.37881300 | 16.18210900 |
| C  | 19.10604800 | -1.07099900 | 16.75664800 |
| H  | 18.66354700 | -0.45618900 | 17.54966600 |
| H  | 19.39889000 | -2.04067500 | 17.17599900 |
| H  | 18.36079700 | -1.22511800 | 15.97142400 |
| C  | 20.97412500 | -1.24316400 | 15.08465600 |
| H  | 21.30730000 | -2.19736000 | 15.50871400 |
| H  | 21.84107000 | -0.73811900 | 14.64643800 |
| H  | 20.24153500 | -1.43488700 | 14.29505500 |
| C  | 21.36919600 | -0.07099000 | 17.28657800 |
| H  | 22.24157500 | 0.44250500  | 16.86719700 |
| H  | 21.69542600 | -1.00209300 | 17.76147900 |
| H  | 20.90504900 | 0.57511900  | 18.04205900 |
| C  | 18.23971000 | 2.94552200  | 18.63199900 |
| C  | 19.15573400 | 3.02711200  | 19.86174000 |
| H  | 19.31669500 | 2.01812800  | 20.26626300 |
| H  | 18.68940700 | 3.64864500  | 20.63771600 |
| H  | 20.12406500 | 3.46117200  | 19.58095400 |
| C  | 18.04449700 | 4.34457400  | 18.01545300 |
| H  | 18.99786200 | 4.69262700  | 17.59195000 |
| H  | 17.69850700 | 5.05004800  | 18.77975000 |
| H  | 17.30381400 | 4.31386800  | 17.20192500 |
| C  | 16.89203600 | 2.30684400  | 19.00150000 |
| H  | 16.36599500 | 2.94141800  | 19.72427600 |
| H  | 17.05678200 | 1.32119500  | 19.45120800 |
| H  | 16.27099200 | 2.19345200  | 18.10308500 |
| Si | 21.66943400 | 2.05983200  | 11.12123800 |
| Si | 26.56784100 | 8.50078100  | 15.13391200 |
| O  | 20.45014400 | 2.58391600  | 12.06481500 |
| O  | 22.60677400 | 3.20119000  | 10.36544800 |
| O  | 22.68488200 | 1.45719300  | 12.37293200 |
| O  | 21.27432200 | 0.93824300  | 9.95613600  |
| O  | 25.49158500 | 8.63993800  | 16.33725900 |
| O  | 25.98453300 | 8.45444400  | 13.57743000 |
| O  | 27.00477500 | 6.85227000  | 15.42077700 |
| O  | 27.85525000 | 9.55719600  | 15.13302700 |
| C  | 22.25664800 | 4.00644700  | 9.20495900  |
| C  | 20.75447400 | 4.32258700  | 9.17999900  |
| H  | 20.45616100 | 4.81651100  | 10.11035100 |
| H  | 20.53229800 | 4.98460300  | 8.33463000  |
| H  | 20.17051800 | 3.40274000  | 9.06433300  |
| C  | 23.07050900 | 5.29952200  | 9.34821400  |
| H  | 24.13867200 | 5.06011900  | 9.39744500  |
| H  | 22.89061100 | 5.95672900  | 8.48968100  |
| H  | 22.78183300 | 5.82086400  | 10.26720300 |
| C  | 22.67636900 | 3.23938900  | 7.94400700  |
| H  | 22.12766200 | 2.29422400  | 7.88205600  |
| H  | 22.46561400 | 3.83892400  | 7.05046800  |
| H  | 23.75073600 | 3.02610900  | 7.97782300  |
| C  | 24.08207100 | 1.02283000  | 12.22734300 |
| C  | 24.98479800 | 2.25733500  | 12.31188500 |
| H  | 24.83746500 | 2.75433600  | 13.27527500 |

|   |             |             |             |
|---|-------------|-------------|-------------|
| H | 26.03577800 | 1.95599400  | 12.22900400 |
| H | 24.73540500 | 2.95260900  | 11.50579300 |
| C | 24.36036300 | 0.07358700  | 13.39715000 |
| H | 23.70720800 | -0.80329800 | 13.33828000 |
| H | 25.40353100 | -0.26128300 | 13.36204700 |
| H | 24.19017500 | 0.59122100  | 14.34711400 |
| C | 24.28072100 | 0.28932000  | 10.89177500 |
| H | 24.10105700 | 0.96848100  | 10.05280200 |
| H | 25.31218300 | -0.07802300 | 10.83427700 |
| H | 23.59502400 | -0.55995400 | 10.81777400 |
| C | 20.21433800 | -0.05351600 | 9.97489700  |
| C | 20.18560300 | -0.80123900 | 11.31374100 |
| H | 19.93585800 | -0.10987700 | 12.12462900 |
| H | 19.42947800 | -1.59475400 | 11.28339200 |
| H | 21.16541200 | -1.24811400 | 11.51809900 |
| C | 20.55031900 | -1.01840600 | 8.82930100  |
| H | 21.52314600 | -1.48827000 | 9.01630400  |
| H | 19.78320200 | -1.79716500 | 8.74981800  |
| H | 20.59834400 | -0.46484400 | 7.88523300  |
| C | 18.87227900 | 0.64424100  | 9.71649400  |
| H | 18.90729800 | 1.16687700  | 8.75383500  |
| H | 18.06218100 | -0.09413500 | 9.68868400  |
| H | 18.67464300 | 1.37040300  | 10.51120700 |
| C | 25.39577200 | 9.54205000  | 12.81057400 |
| C | 24.58934400 | 10.48558600 | 13.71753800 |
| H | 25.24875900 | 10.97690600 | 14.44151200 |
| H | 24.10450500 | 11.25751600 | 13.10336100 |
| H | 23.82585200 | 9.92424500  | 14.25985100 |
| C | 24.46422300 | 8.86143600  | 11.79916600 |
| H | 23.70432300 | 8.28447700  | 12.33190600 |
| H | 23.97390100 | 9.61260900  | 11.16422800 |
| H | 25.04055000 | 8.18202800  | 11.16128600 |
| C | 26.51834600 | 10.29526400 | 12.09202600 |
| H | 27.07569200 | 9.60875300  | 11.44579400 |
| H | 26.10129300 | 11.10128300 | 11.47662500 |
| H | 27.20906800 | 10.72430200 | 12.82747800 |
| C | 27.72750700 | 5.97169000  | 14.49183800 |
| C | 26.70894500 | 5.34203900  | 13.53177300 |
| H | 26.17859800 | 6.12888900  | 12.98810400 |
| H | 27.22018400 | 4.68377300  | 12.81935500 |
| H | 25.99212000 | 4.74207100  | 14.10116100 |
| C | 28.38860800 | 4.88639900  | 15.34754900 |
| H | 27.62701900 | 4.32117400  | 15.89594700 |
| H | 28.94132800 | 4.18991200  | 14.70222900 |
| H | 29.08736900 | 5.33714200  | 16.05981900 |
| C | 28.79630100 | 6.76713100  | 13.73142900 |
| H | 29.47443800 | 7.25879200  | 14.43598000 |
| H | 29.37162700 | 6.08243000  | 13.09729000 |
| H | 28.32938300 | 7.52163400  | 13.09771100 |
| C | 28.37114600 | 10.36143200 | 16.22770300 |
| C | 29.66051800 | 10.98656300 | 15.67798500 |
| H | 29.43326200 | 11.57924400 | 14.78528500 |
| H | 30.11733500 | 11.63606300 | 16.43336200 |
| H | 30.36961800 | 10.19690200 | 15.40611400 |
| C | 27.34934200 | 11.45034600 | 16.58346300 |

|   |             |             |             |
|---|-------------|-------------|-------------|
| H | 26.42322600 | 10.98037200 | 16.93859300 |
| H | 27.74876300 | 12.10244600 | 17.36948200 |
| H | 27.13327100 | 12.05845700 | 15.69283300 |
| C | 28.68098100 | 9.48795600  | 17.44750000 |
| H | 29.37791300 | 8.68598400  | 17.16738300 |
| H | 29.14651700 | 10.09988000 | 18.22915700 |
| H | 27.76574700 | 9.05186900  | 17.84642000 |
| O | 23.03250700 | 6.50758400  | 15.42142300 |
| C | 22.62925700 | 5.39829900  | 15.01140800 |
| O | 21.73037800 | 5.07185800  | 14.21656500 |
